# Supplementary material for: A multidisciplinary approach to mental illness: do inflammation, telomere length and microbiota form a loop? A protocol for a cross-sectional study on the complex relationship between inflammation, telomere length, gut microbiota and psychiatric disorders
Source: PubMed Central journal article supplement — BMJ Open. 2020 Jan 26;10(1):e032513. doi: 10.1136/bmjopen-2019-032513 (PMC7045141; doi:10.1136/bmjopen-2019-032513), 2020-01-26
Supplement: bmjopen-2019-032513.draft_revisions.pdf [file bmjopen-2019-032513.draft_revisions.pdf]

# BMJ Open

BMJ Open is committed to open peer review. As part of this commitment we make the peer review history of every article we publish publicly available.

When an article is published we post the peer reviewers' comments and the authors' responses online. We also post the versions of the paper that were used during peer review. These are the versions that the peer review comments apply to.

The versions of the paper that follow are the versions that were submitted during the peer review process. They are not the versions of record or the final published versions. They should not be cited or distributed as the published version of this manuscript.

BMJ Open is an open access journal and the full, final, typeset and author-corrected version of record of the manuscript is available on our site with no access controls, subscription charges or pay-per-view fees (<http://bmjopen.bmj.com>).

If you have any questions on BMJ Open's open peer review process please email [info.bmjopen@bmj.com](mailto:info.bmjopen@bmj.com)

# BMJ Open

**A multidisciplinary approach to mental illness: do inflammation, telomere length and microbiota form a loop?  
A protocol for a cross-sectional study on the complex relationship between inflammation, telomere length, gut microbiota and psychiatric disorders**

|                               |                                                                                                                                                                                                                                                                                                                                                                                                                                                                                                                                                                                                                                                                                                                                                                                                                                                                                                                                                                                                                                                                                                                                                                                                                                                       |
|-------------------------------|-------------------------------------------------------------------------------------------------------------------------------------------------------------------------------------------------------------------------------------------------------------------------------------------------------------------------------------------------------------------------------------------------------------------------------------------------------------------------------------------------------------------------------------------------------------------------------------------------------------------------------------------------------------------------------------------------------------------------------------------------------------------------------------------------------------------------------------------------------------------------------------------------------------------------------------------------------------------------------------------------------------------------------------------------------------------------------------------------------------------------------------------------------------------------------------------------------------------------------------------------------|
| Journal:                      | <i>BMJ Open</i>                                                                                                                                                                                                                                                                                                                                                                                                                                                                                                                                                                                                                                                                                                                                                                                                                                                                                                                                                                                                                                                                                                                                                                                                                                       |
| Manuscript ID                 | bmjopen-2019-032513                                                                                                                                                                                                                                                                                                                                                                                                                                                                                                                                                                                                                                                                                                                                                                                                                                                                                                                                                                                                                                                                                                                                                                                                                                   |
| Article Type:                 | Protocol                                                                                                                                                                                                                                                                                                                                                                                                                                                                                                                                                                                                                                                                                                                                                                                                                                                                                                                                                                                                                                                                                                                                                                                                                                              |
| Date Submitted by the Author: | 21-Jun-2019                                                                                                                                                                                                                                                                                                                                                                                                                                                                                                                                                                                                                                                                                                                                                                                                                                                                                                                                                                                                                                                                                                                                                                                                                                           |
| Complete List of Authors:     | <p>Manchia, Mirko; Dalhousie University, Pharmacology; Universita degli Studi di Cagliari, Medical Science and Public Health<br/>         Paribello, Pasquale; University of Cagliari, Unit of Clinical Psychiatry, University Hospital Agency of Cagliari<br/>         Arzedi, Carlo<br/>         Bocchetta, Alberto<br/>         Caria, Paola<br/>         Cocco, Cristina<br/>         Congiu, Donatella<br/>         Cossu, Eleonora<br/>         Dettori, Tinuccia<br/>         Frau, Daniela Virginia<br/>         Garzilli, Mario<br/>         Manca, Elias<br/>         Meloni, Anna<br/>         Montis, Maria Antonietta<br/>         Mura, Andrea<br/>         Nieddu, Mariella<br/>         Noli, Barbara<br/>         Pinna, Federica<br/>         Pisanu, Claudia<br/>         Robledo, Renato; University of Cagliari, Department of Biomedical Sciences<br/>         Severino, Giovanni<br/>         Sogos, Valeria<br/>         Chillotti, Caterina<br/>         Carpiello, Bernardo; Universita degli Studi di Cagliari, Medical Science and Public Health<br/>         Del Zompo, Maria<br/>         Ferri, Gian Luca<br/>         Vanni, Roberta<br/>         Squassina, Alessio; University of Cagliari, Biomedical Sciences</p> |
| Keywords:                     | biomarker, aging, allostasis, ELISA, sybr green                                                                                                                                                                                                                                                                                                                                                                                                                                                                                                                                                                                                                                                                                                                                                                                                                                                                                                                                                                                                                                                                                                                                                                                                       |

1  
2  
3  
4  
5  
6  
7  
8  
9  
10  
11  
12  
13  
14  
15  
16  
17  
18  
19  
20  
21  
22  
23  
24  
25  
26  
27  
28  
29  
30  
31  
32  
33  
34  
35  
36  
37  
38  
39  
40  
41  
42  
43  
44  
45  
46  
47  
48  
49  
50  
51  
52  
53  
54  
55  
56  
57  
58  
59  
60

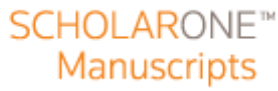

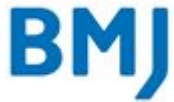

I, the Submitting Author has the right to grant and does grant on behalf of all authors of the Work (as defined in the below author licence), an exclusive licence and/or a non-exclusive licence for contributions from authors who are: i) UK Crown employees; ii) where BMJ has agreed a CC-BY licence shall apply, and/or iii) in accordance with the terms applicable for US Federal Government officers or employees acting as part of their official duties; on a worldwide, perpetual, irrevocable, royalty-free basis to BMJ Publishing Group Ltd ("BMJ") its licensees and where the relevant Journal is co-owned by BMJ to the co-owners of the Journal, to publish the Work in this journal and any other BMJ products and to exploit all rights, as set out in our [licence](#).

The Submitting Author accepts and understands that any supply made under these terms is made by BMJ to the Submitting Author unless you are acting as an employee on behalf of your employer or a postgraduate student of an affiliated institution which is paying any applicable article publishing charge ("APC") for Open Access articles. Where the Submitting Author wishes to make the Work available on an Open Access basis (and intends to pay the relevant APC), the terms of reuse of such Open Access shall be governed by a Creative Commons licence – details of these licences and which [Creative Commons](#) licence will apply to this Work are set out in our licence referred to above.

Other than as permitted in any relevant BMJ Author's Self Archiving Policies, I confirm this Work has not been accepted for publication elsewhere, is not being considered for publication elsewhere and does not duplicate material already published. I confirm all authors consent to publication of this Work and authorise the granting of this licence.

1  
2  
3 **A multidisciplinary approach to mental illness: do inflammation, telomere length and microbiota form**  
4 **a loop? A protocol for a cross-sectional study on the complex relationship between inflammation,**  
5 **telomere length, gut microbiota and psychiatric disorders.**  
6  
7  
8  
9

10  
11  
12 Mirko Manchia<sup>1,2,3</sup>, Pasquale Paribello<sup>1,2</sup>, Carlo Arzedi<sup>1,2</sup>, Alberto Bocchetta<sup>4,5</sup>, Paola Caria<sup>6</sup>, Cristina  
13 Cocco<sup>5</sup>, Donatella Congiu<sup>4</sup>, Eleonora Cossu<sup>1,2</sup>, Tinuccia Dettori<sup>6</sup>, Daniela Virginia Frau<sup>6</sup>, Mario Garzilli<sup>1,2</sup>,  
14 Elias Manca<sup>7</sup>, Anna Meloni<sup>4</sup>, Maria Antonietta Montis<sup>1,2</sup>, Andrea Mura<sup>1,2</sup>, Mariella Nieddu<sup>6</sup>, Barbara Noli<sup>7</sup>,  
15 Federica Pinna<sup>1,2</sup>, Claudia Pisanu<sup>4</sup>, Renato Robledo<sup>6</sup>, Giovanni Severino<sup>4</sup>, Valeria Sogos<sup>8</sup>, Caterina  
16 Chillotti<sup>4,5</sup>, Bernardo Carpiello<sup>1,2</sup>, Maria Del Zompo<sup>4,5</sup>, Gian Luca Ferri<sup>7</sup>, Roberta Vanni<sup>6</sup>, Alessio  
17 Squassina<sup>4\*</sup>  
18  
19  
20  
21  
22  
23  
24  
25  
26  
27  
28  
29

30 <sup>1</sup>Unit of Psychiatry, Department of Public Health, Clinical and Molecular Medicine, University of Cagliari,  
31 Cagliari, Italy; <sup>2</sup>Unit of Clinical Psychiatry, University Hospital Agency of Cagliari, Cagliari, Italy; <sup>3</sup>  
32 Department of Pharmacology, Dalhousie University, Halifax, Nova Scotia, Canada; <sup>4</sup>Department of  
33 Biomedical Sciences, Section of Neuroscience and Clinical Pharmacology, University of Cagliari, Italy; <sup>5</sup>  
34 Unit of Clinical Pharmacology, University Hospital Agency of Cagliari, Italy; <sup>6</sup>Department of Biomedical  
35 Sciences, Unit of Biology and Genetics, University of Cagliari, Italy; <sup>7</sup>Department of Biomedical Sciences,  
36 NEF Laboratory, University of Cagliari, Italy; <sup>8</sup>Department of Biomedical Sciences, Section of  
37 Cytomorphology, University of Cagliari, Monserrato, Italy.  
38  
39  
40  
41  
42  
43  
44  
45  
46  
47  
48  
49  
50

51 \*Correspondence to:

52 Alessio Squassina, PhD  
53  
54  
55  
56  
57  
58  
59  
60

1  
2  
3 Laboratory of Pharmacogenomics, Department of Biomedical Sciences, Section of Neuroscience and  
4  
5 Clinical Pharmacology, University of Cagliari, Italy  
6  
7

8 Cittadella Universitaria di Monserrato  
9

10 SP8 Sestu-Monserrato, Km 0.700  
11  
12

13 09042 Cagliari, Italy  
14

15 E-mail address: [squassina@unica.it](mailto:squassina@unica.it)  
16  
17

18  
19  
20 **Word count:** 3,544  
21  
22  
23  
24  
25  
26  
27  
28  
29  
30  
31  
32  
33  
34  
35  
36  
37  
38  
39  
40  
41  
42  
43  
44  
45  
46  
47  
48  
49  
50  
51  
52  
53  
54  
55  
56  
57  
58  
59  
60

For peer review only

## ABSTRACT

**Introduction:** Severe psychiatric disorders such as bipolar disorder (BD), schizophrenia (SCZ), and major depressive disorder (MDD) are typically associated with a significant reduction in life expectancy compared to the general population. Among the different hypotheses formulated to explain this observation, accelerated aging has been increasingly recognized as the main culprit. At the same time, telomere shortening is becoming widely accepted as a proxy molecular marker of the aging process. With the present study, we aim to fill a gap in the literature by better defining the complex interaction/s between inflammation, age-related co-morbidities, telomere shortening and the gut microbiota in psychiatric disorders.

**Methods and analysis:** A cross-sectional study is proposed, recruiting 40 patients for each of three different diagnostic categories (BD, MDD, SCZ) treated at the Section of Psychiatry and at the Unit of Clinical Pharmacology of the University Hospital Agency of Cagliari (Italy), compared to 40 age and sex matched non-psychiatric controls (HC). Each group purposely includes a comparable number of individuals suffering, or not, from age-related co-morbidities, to account for the impact of these medical conditions on the biological make-up of recruited patients. The inflammatory state, microbiota composition, and the leukocytes telomere length (LTL) are assessed.

**Ethics and dissemination:** The present study protocol was approved by the Ethics Committee of the University Hospital Agency of Cagliari (PG/2018/11693, September 5, 2018). The study is conducted in accordance with the principles of good clinical practice, and the Declaration of Helsinki, and in compliance with the relevant Italian national legislation. Written, informed consent is obtained from all participants. Participation to the study is on a voluntary basis only, and patients may withdraw their consent at any point with no disadvantage to their treatment/s.

1  
2  
3 A psychiatric assessment establishes that the patients' ability to provide their consent is duly  
4  
5 retained.  
6  
7  
8  
9  
10

11 **Keywords:** biomarker; aging; allostasis; ELISA; sybr green  
12  
13  
14  
15  
16  
17  
18  
19  
20  
21  
22  
23  
24  
25  
26  
27  
28  
29  
30  
31  
32  
33  
34  
35  
36  
37  
38  
39  
40  
41  
42  
43  
44  
45  
46  
47  
48  
49  
50  
51  
52  
53  
54  
55  
56  
57  
58  
59  
60

For peer review only



1  
2  
3  
4  
5  
6  
7  
8  
9  
10  
11  
12  
13  
14  
15  
16  
17  
18  
19  
20  
21  
22  
23  
24  
25  
26  
27  
28  
29  
30  
31  
32  
33  
34  
35  
36  
37  
38  
39  
40  
41  
42  
43  
44  
45  
46  
47  
48  
49  
50  
51  
52  
53  
54  
55  
56  
57  
58  
59  
60

## Article summary

### Strengths and limitations of this study

- This is a novel approach proposing a systematic investigation of the complex interplay between inflammation, microbiota, and telomere shortening in modulating the liability for major psychiatric disorders.
- The balanced recruitment of individuals affected and unaffected by age-related co-morbidities among the 4 study groups, allows for a clearer definition of the possible confounding effects of these chronic medical conditions on telomere shortening, inflammatory status, and microbiota composition.
- The cross-sectional design does not allow for a causal inference of any possible finding on the explored psychiatric conditions, as these may simply represent epiphenomena of these disorders.
- The small sample size and the relatively restricted catchment area may limit the generalizability of the results.

## Introduction

Bipolar disorder (BD) is a severe and chronic psychiatric disorder characterized by alternating manic and depressive episodes interspersed with periods of well-being. Its prevalence in the general population ranges from 0.8 to 1.2%<sup>1</sup> and is associated with high levels of disability and premature mortality.<sup>2</sup> Indeed, Bipolar disorder patients have a 10 to 20 years reduction in their life expectancy compared to the general population, an epidemiological mark shared with other severe mental disorders, including schizophrenia (SCZ) and major depression (MD).<sup>3</sup> A vast body of data suggests that this excess mortality is accounted for by a higher prevalence of co-morbid chronic somatic disorders compared to individuals without mental illnesses.<sup>4</sup> In fact, age-related illnesses, such as cardiovascular and metabolic disorders, whose pathophysiology carries an inflammatory component, present a significantly higher incidence in psychiatric patients than in the general population.<sup>5,6</sup> This evidence has led to the hypothesis that accelerated aging and inflammation may play a central role in the etiopathogenesis of mental disorders. Biological signatures of these events are represented by telomere shortening (TS) and increased levels of pro-inflammatory markers. Several studies have reported shorter leukocyte telomere length (LTL) as well as increased levels of circulating pro-inflammatory cytokines in BD, SCZ, and MD patients compared to controls.<sup>7-9</sup> These findings strongly support the involvement of altered telomere and inflammatory dynamics in the neurobiological underpinnings of severe psychiatric disorders and suggest that signatures of these processes might be detectable in peripheral tissues. Telomere shortening is a hallmark of cellular aging, and while telomere length reduce with each cell division, the shortening rate is increased by allostatic load and inflammation,<sup>10</sup> thus affecting the ageing process. Consistently, a recent study evaluating mortality in more than 64,000 subjects from the general population, showed that short telomeres in peripheral blood leukocytes were associated with high mortality.<sup>11</sup> So far, findings of shorter telomeres in psychiatric patients have been contradictory,<sup>12</sup> likely due to underpowered study

1  
2  
3 samples and limitations in methodologies, while the interaction between inflammatory processes,  
4  
5 telomeres shortening and psychiatric disorders has been scarcely investigated. There is evidence that  
6  
7 pro-inflammatory cytokines are important mediators of the association between depressive and anxiety  
8  
9 disorders and LTL.<sup>13</sup> Moreover, the impact of co-morbid age-related disorders has been often  
10  
11 overlooked in previous telomere studies in psychiatry. Although current data suggest that TS,  
12  
13 inflammation and accelerated aging may play a central role in modulating the liability for severe  
14  
15 psychiatric disorders, differences and similarities in their involvement in mental illnesses have yet to be  
16  
17 elucidated and therefore need comprehensive investigations.  
18  
19  
20  
21  
22

23 Alterations of these biological pathways in severe psychiatric disorders might also influence other  
24  
25 relevant physiological components. It is known that an estimate of 40,000 bacterial species and 1,800  
26  
27 phyla inhabits our body, paralleling the number of human cells, and approaching a ratio of nearly 1:1  
28  
29 according to recent estimates.<sup>14</sup> As a whole, the microorganisms living in our body are collectively  
30  
31 referred to as microbiota, and include bacteria, fungi and protozoa. The microbiota serves multiple  
32  
33 physiological functions, although its overall importance has not been fully grasped yet. A state of balance  
34  
35 between “good” bacteria and “harmful” bacteria (called “eubiosis”) is therefore paramount to maintain  
36  
37 the homeostasis of its hosting organism. On the other hand, the perturbation of this balance (called  
38  
39 “disbiosis”) is related to the development of several pathological conditions. For example, the  
40  
41 microbiota works synergistically with the immune system to avoid colonization from pathogenic bacteria  
42  
43 and viruses. The microbiota also plays a role in metabolism, participating in the digestion by aiding  
44  
45 micronutrients absorption (in particular amino acids and short-chain fatty acids), and part of their further  
46  
47 degradation as well. Another significant example is represented by the increased incidence of major  
48  
49 cardiovascular events related to high levels of trimethylamine-N-oxide (TMAO).<sup>15</sup> The latter compound  
50  
51 derives from the microbiota metabolism of several nutrients (in particular lecithin), and has been  
52  
53  
54  
55  
56  
57  
58  
59  
60

1  
2  
3 associated with an increased cholesterol accumulation in macrophages.<sup>15</sup> Moreover, broad-spectrum  
4  
5 oral antibiotics reduce the TMAO production, and upon suspension of antibiotic therapy, its production  
6  
7 increases again, underscoring the direct relationship between TMAO production and the microbiota. An  
8  
9 increased production of TMAO might indeed represent an independent risk factor for atherosclerosis.<sup>15</sup>  
10  
11

12  
13 Although dysbiosis has been clearly associated with numerous ailments, it is not clear whether a causal  
14  
15 relationship exists between these two phenomena or, instead, if anomalies in the microbiota  
16  
17 composition represent an epiphenomenon of the underlying pathological processes. Similarly, the  
18  
19 eventual preemptive or even therapeutic effects deriving from the microbiota manipulation remain  
20  
21 unclear. However, there is now consisting evidence that the microbiota, particularly gut microbiota,  
22  
23 exerts a modulatory function on the brain, possibly even modulating behavior.<sup>16</sup> Indeed, experimental  
24  
25 data in animal models show that CNS neurotransmission can be profoundly disturbed by the absence of  
26  
27 a normal gut microbiota<sup>17</sup> and that alterations of eubiosis with induced acute bacterial infection might  
28  
29 induce cognitive alterations.<sup>18</sup> In humans, data have correlated alterations of microbiota with the  
30  
31 manifestation of autism spectrum disorder (ASD).<sup>19</sup> Interestingly, a recent translational study operated  
32  
33 transplants of gut microbiota from human donors with ASD controls into germ-free mice revealing that  
34  
35 colonization with ASD microbiota was sufficient to induce hallmark autistic behaviors<sup>20</sup>. Other severe  
36  
37 psychiatric disorders, such as SCZ<sup>21</sup> and MDD<sup>22</sup> show substantial microbiota imbalances. Relevant to  
38  
39 this study protocol is the evidence that a proportion of this altered gut–brain communication in severe  
40  
41 mental disorders, determined by a pathological microbiota, is determined through an  
42  
43 immunomodulatory action, which includes a raise in the activity of inflammatory pathways.<sup>23</sup>  
44  
45  
46  
47  
48  
49  
50  
51  
52  
53  
54  
55

## 56 **Study objectives**

57  
58  
59  
60

1  
2  
3 The main objective of the present protocol is to clarify the relationship between LTL and  
4  
5 inflammation in the etiopathogenesis of BD, SCZ and MDD. Furthermore, we evaluate the impact  
6  
7 of the age-related medical co-morbidities on these biological markers. Contextually, we aim to  
8  
9 determine the presence of alterations in the gut microbiota composition in individuals affected by  
10  
11 SCZ, MDD and BD, as compared with healthy controls (HC). As reported above, several lines of  
12  
13 evidence suggest that the microbiota might play a significant role on the brain-gut axis, and  
14  
15 microbial derangement may result in the development of several psychiatric conditions.<sup>24</sup>  
16  
17 Specifically, our study tests the following primary and secondary hypotheses:  
18  
19  
20  
21  
22

23 Primary:

- 24  
25 • To determine the differences in LTL among individuals affected by SCZ, MDD, BD and healthy  
26  
27 controls;
- 28  
29 • To test for the presence of differences in inflammatory markers among patients affected by SCZ,  
30  
31 MDD, BD and healthy controls;
- 32  
33 • To assess whether microbiota composition differs among individuals affected by SCZ, MDD, BD  
34  
35 and healthy controls.  
36  
37  
38  
39  
40

41 Secondary:

- 42  
43 • To clarify the impact of medical co-morbidities related to aging on the differences in LTL and in  
44  
45 the number of short telomeres, as well as on inflammatory markers levels and on microbiota;  
46  
47  
48  
49  
50  
51  
52  
53  
54  
55  
56  
57  
58  
59  
60

## Methods

### Study design

This is a cross-sectional study in the context of which we are performing the recruitment of three cohorts, each comprised of 40 patients affected by SCZ, MDD, and BD diagnosed with the Italian version of the Structured Clinical Interview for DSMIV-TR Axis I Disorders (SCID)<sup>25</sup>. In addition, we are recruiting a sample of 40 HC.

### Patient and Public involvement.

There was no involvement of patients in the development of this study protocol. The patients were asked to report their impression on the time required to participate in the study and the burden of the sample procedure as well. An effort is constantly made to facilitate the participation of the eligible individuals, taking into account their indications and minimizing the potential disruption given sampling procedures. Patients were not involved in the development of the recruitment process, but they will be part of the dissemination phase of the study results. Indeed, we plan to describe using lay language the main findings of the study to the participants and their families organizing a local conference.

### Recruitment process

The sample is recruited from patients followed-up and treated at the community mental health centre of the Section of Psychiatry of the Department of Medical Science and Public Health, University of Cagliari and University Hospital Agency of Cagliari and the Unit of Clinical Pharmacology, University Hospital Agency, Cagliari, Italy. The recruitment process is performed on the basis of the presence or absence of medical co-morbidities related to aging (e.g. cardiovascular diseases, diabetes mellitus type 2, etc). Approximately half of the subjects for each group are recruited on the basis of the presence of such co-

1  
2  
3  
4  
5  
6  
7  
8  
9  
10  
11  
12  
13  
14  
15  
16  
17  
18  
19  
20  
21  
22  
23  
24  
25  
26  
27  
28  
29  
30  
31  
32  
33  
34  
35  
36  
37  
38  
39  
40  
41  
42  
43  
44  
45  
46  
47  
48  
49  
50  
51  
52  
53  
54  
55  
56  
57  
58  
59  
60

morbidities. Healthy controls are recruited by word of mouth among hospital staff, their families, and university students.

### **Inclusion and exclusion criteria**

The recruitment process is based on the following inclusion criteria: 1) patients affected by SCZ, BD, MDD according to DSM IV-TR<sup>26</sup> criteria; 2) able to express a consent to participate formulated by signing the consent form; 3) age between 18 and 70 years-old; 4) in euthymic phases for BD and MDD and with at least the six months of stability before recruitment for SCZ. We also apply the following exclusion criteria: 1) presence of acute infections; 2) presence of chronic autoimmune inflammatory conditions (e.g. rheumatoid arthritis, thyroiditis); 3) presence of eating disorders; 4) presence of post-traumatic stress disorder; 5) presence of current substance use disorders; 6) presence of neurological disorders; 7) past traumatic brain injury; 8) presence of severe co-morbidities that may influence molecular testing (such as cancer, HIV infection). The inclusion criteria for healthy controls comprise: 1) the absence of a personal history of mental disorders, 2) the willingness to participate in the study, 3) absence of acute infections; 4) absence of chronic autoimmune inflammatory conditions (e.g. rheumatoid arthritis, thyroiditis); 5) absence of past traumatic brain injury; 6) absence of severe co-morbidities that may influence molecular testing (such as cancer, HIV infection). In addition to the above exclusions criteria for HC and patients, the following are considered in relation to the microbiota study: use of antibiotics in the month preceding the sampling procedure, chronic use of probiotics.

### **Sample size estimation**

Considering the magnitude of the effect size reported in the literature regarding the correlation between LTL and mood disorders (Cohen  $d=0.67$ <sup>27</sup>), our sample has an 85% statistical power to

1  
2  
3 identify the existing differences between the diagnostic groups (SCZ, BD, MDD) and HC at an  $\alpha =$   
4  
5 0.05. Similarly, we assume adequate statistical power for the microbiota analysis as we are  
6  
7 recruiting a sample of similar size of that analyzed in the study of Yuan et al. (N=40).<sup>28</sup>  
8  
9

### 13 **Clinical assessment**

14  
15 Recruited subjects are assessed by trained mental-health professionals (psychiatry residents or senior  
16  
17 clinical staff). Clinical information is collected through direct interview of the patient as well as through a  
18  
19 systematic assessment of existing medical records. Whenever possible we are collecting collateral  
20  
21 information from at least one first degree relative or significant other, after obtaining the consent from  
22  
23 the participant. Specific to patients' groups are the following clinical data: age of onset, history of suicide  
24  
25 attempt, history of violent attempt, type of onset, number of episodes, including depressive,  
26  
27 hypomanic/manic, mixed recurrences (for BD and MDD), family history of psychiatric disorders, presence  
28  
29 of past and current substance and/or alcohol use disorder, past and current pharmacological treatments,  
30  
31 duration of pharmacological treatment, type of drugs. Treatment resistance for MDD and SCZ patients is  
32  
33 defined according to the criteria of Souery et al.<sup>29</sup> and Kane et al.<sup>30</sup>, and is based on the clinical course  
34  
35 and evaluation of treatment response patterns. In addition, we are collecting, for patients and HC,  
36  
37 detailed data on the presence of past and current cigarette smoking status, number of cigarettes per day  
38  
39 (categorized according to Fagerström criteria<sup>31</sup>), height, weight, body mass index, cardiovascular and  
40  
41 metabolic co-morbidity, presence of physical activity. We are also gathering data on diet, as this is  
42  
43 relevant to the analysis of microbiota, including: presence of vegan diet, and type of diet (categorized as  
44  
45 Mediterranean, junk food, high meat consumption, high consumption of baked products, high  
46  
47 carbohydrates diet, vegetarian, and vegan).  
48  
49  
50  
51  
52  
53  
54  
55  
56  
57  
58  
59  
60



1  
2  
3 Finally, for healthy controls, the screening study visit includes a clinical interview (1 ½ hrs long). Each  
4  
5 subject will be interviewed using the Italian version of the SCID-I/NP<sup>25</sup> to rule out the presence of Axis I  
6  
7  
8 psychiatric disorders.  
9

### 10 11 12 **Psychopathological measures**

13  
14  
15 Some psychopathological measures are used to establish the stability of the illness at the moment of  
16  
17 recruitment: the Positive and Negative Scale for Schizophrenia (PANSS)<sup>32</sup> and the Clinical Global  
18  
19 Impression Scale for Schizophrenia (CGI-SCH)<sup>33</sup>, which have both shown to be valid assessment tools for  
20  
21 the identification of patients in remission, particularly in routine clinical practice.<sup>34,35</sup> In BD patients we  
22  
23 assess the response to mood stabilizers using the "Retrospective Criteria of Long-Term Treatment  
24  
25 Response in Research Subjects with Bipolar Disorder" scale.<sup>36</sup>  
26  
27  
28  
29  
30  
31

### 32 **Blood sampling and assay procedures**

33  
34 Fasting peripheral venous blood samples are taken from all patients within a similar time window ( 8:00  
35  
36 to 10:00 AM). Blood samples are collected in an euthymic phase (for MDD and BD patients), or at least  
37  
38 6 months after their latest exacerbation of psychopathological symptoms (for SCZ patients). Specimens  
39  
40 are divided in 3 aliquots: (1) for measurement of plasma C-reactive protein (high sensitivity CRP assay)  
41  
42 and the proinflammatory cytokines TNF- $\alpha$  and IL-6, using enzyme-linked immunosorbent assays (ELISA);  
43  
44  
45  
46 (2) for DNA extraction and the subsequent measurement of LTL with qPCR; (3) for measurement of  
47  
48 telomere length using Quantitative Fluorescent in situ hybridization (qFISH) on the metaphase  
49  
50 chromosomes in lymphocytes.<sup>37</sup>  
51  
52  
53  
54  
55  
56

### 57 **Fecal microbiota analysis methods**

1  
2  
3 The 16S RNA Microbial Profiling is a test capable of exploiting the recent technological advances of  
4 metagenomic in microbiota ecology: it is based on the sequencing of the regions V3 and V4 of the  
5  
6 16S rRNA (the gene responsible for the production of the prokaryote small ribosomal subunit), a  
7  
8 gene which represents an important marker widely used in bacterial taxonomy. Starting from  
9  
10 biological material (a stool sample) we are isolating bacterial DNA further processed to amplify the  
11  
12 16S gene rRNA. The analysis is completed thereafter by sequencing the 16S rRNA gene pool  
13  
14 corresponding to the different microorganisms present in the microbiota, subsequently identified  
15  
16 through the use of bioinformatic tools (Metagenomics Illumina Inc. and Kraken APP).  
17  
18  
19  
20  
21  
22  
23  
24

### 25 **Data analysis plan**

26  
27 The association between LTL or cytokine levels and demographic/clinical variables is tested using  
28  
29 parametric or non-parametric tests according to the observed distribution. The presence of  
30  
31 statistically significant differences in the LTL and in the cytokine plasma levels among the different  
32  
33 study groups (SCZ, BD, MDD, HC) is tested through linear regression. Furthermore, the presence  
34  
35 of medical co-morbidities related to aging, and the other demographic and clinical variables  
36  
37 significantly associated with the outcome are inserted in the regression model. The analyses will  
38  
39 be conducted using R<sup>38</sup> and IBM Statistical Package for Social Science (SPSS®). As for the  
40  
41 microbiota analysis, the position, dispersion and shape indexes will be calculated for the  
42  
43 quantitative variables, whilst the relative frequency for each class will be calculated for categorical  
44  
45 variables. In addition, the correlations between the different analyzed variables will be evaluated  
46  
47 by employing the aforementioned univariate and multivariate analysis methods.  
48  
49  
50  
51  
52  
53  
54  
55  
56

### 57 **Ethics**

1  
2  
3  
4  
5  
6  
7  
8  
9  
10  
11  
12  
13  
14  
15  
16  
17  
18  
19  
20  
21  
22  
23  
24  
25  
26  
27  
28  
29  
30  
31  
32  
33  
34  
35  
36  
37  
38  
39  
40  
41  
42  
43  
44  
45  
46  
47  
48  
49  
50  
51  
52  
53  
54  
55  
56  
57  
58  
59  
60

### Ethics, consent and permissions

This study protocol was approved by the Ethics Committee of the University Hospital Agency of Cagliari (PG/2018/11693) on September 5, 2018. The study is conducted in accordance with the principles of good clinical practice, with the Declaration of Helsinki and in compliance with the national legislation. Written, informed consent is being obtained from all participants.

Participation to the study is voluntary and patients may be able to withdraw consent at any point with no disadvantage to their treatments. A psychiatric assessment establishes that patients' ability to consent is not compromised by their psychopathological status.

### Status of recruitment

Collection of clinical data and biological samples is currently undergoing and at the moment of the preparation of the protocol 87% of the sample has been recruited (104/120). Clinical data have been already cleaned and inputted into a database in preparation of data analysis. The main socio-demographic and clinical characteristics for the BD, MDD, SCZ and HC samples are summarized in Supplementary Table 1.

## Discussion

In this study, we sought to explore the relationship between telomere length, inflammation, the microbiota and the impact of their interaction on the risk of developing a severe mental disorder such as SCZ, BD or MDD. In addition, a corollary objective is to establish similarities and differences in how abnormal molecular dynamics among telomeres, inflammation and microbiota manifest in SCZ, BD, MDD. A novel approach in our study is to ascertain the impact of the age-related medical co-morbidities on such molecular dynamics. Previous research has shown that accelerated biological aging is a hallmark of severe psychiatric disorders.<sup>39–41</sup> Molecular signatures of this accelerated decay are currently being identified and point to TS as well as to a series of inflammatory markers. In the case of SCZ, a recent meta-analysis has found that SCZ patients have a highly statistically significant shortening of LTL compared to HC.<sup>42</sup> Further, a recent qualitative synthesis of the literature has found that consisting evidence points to elevated levels of pro-inflammatory cytokines and chemokines in SCZ, including interleukin (IL)- IL-1 $\beta$ , tumor necrosis factor alpha (TNF $\alpha$ ), Eotaxin-1, Eotaxin-2, monocyte chemoattractant protein-1, macrophage inflammatory protein-1 $\beta$ , thymus- and activation-regulated chemokine, macrophage-derived chemokine, as well as a decline in the levels of the anti-inflammatory cytokine IL-2.<sup>39</sup> In BD patients there is evidence of a significant LTL shortening compared to HC irrespective of mood-state.<sup>43</sup> Similarly to SCZ, the inflammatory patterns in BD are characterized by increased levels of TNF- $\alpha$ , the soluble tumor necrosis factor receptor type 1 (sTNF-R1) and the soluble interleukin-2 receptor (sIL-2R) compared to HC.<sup>44</sup> Of note, there are intriguing findings, although still at the level of experimental pre-clinical data, suggesting that perturbations of the gut microbiota composition and the functional metagenome may be associated with accelerated aging in animal models.<sup>45</sup> In summary, the literature shows that: 1) there is a plausible interaction between

1  
2  
3 inflammation and TS in modulating the risk of severe psychiatric disorders, and 2) this association  
4  
5 might reflect (or be modulated) by specific detrimental alterations of the microbiota. However,  
6  
7  
8 available data also tell that: 1) no previous studies have so far examined the role of confounders  
9  
10 (mainly the presence of age-related medical co-morbidities) in influencing the dynamics between  
11  
12 accelerated biological aging and inflammation in psychiatric disorders, and 2) there is a gap in the  
13  
14  
15 knowledge on how microbiota might influence these dynamics in humans.  
16

17  
18 Our project has been set in this context. We expect to demonstrate that a shortening of LTL  
19  
20 and/or a higher number of short telomeres will be present in the diagnostic groups (SCZ, MDD,  
21  
22 BD) as compared with HC. We also expect that the pro-inflammatory cytokines levels will be  
23  
24 higher among patients and will be negatively correlated with the LTL. Further, we anticipate that  
25  
26 patients with medical co-morbidities related to aging will present shorter telomeres and higher  
27  
28 pro-inflammatory cytokines levels as compared with patients bereft of such co-morbidities.  
29

30  
31  
32 Finally, we expect to identify specific microbiota clusters associated with the diagnostic groups  
33  
34 (SCZ, BD, MDD) and related to specific biological markers of inflammation and accelerated aging.  
35

36  
37 Clearly, our study findings will need to be interpreted in the context of several limitations. First,  
38  
39 due to the cross-sectional design, we will not be able to establish causality (i.e. whether biological  
40  
41 markers of aging resulted from an increased inflammatory load or vice versa). Due to the  
42  
43 relatively small sample size, our study should be considered as hypothesis generator, capable of  
44  
45 clarifying the association strength between the different variables. The resulting data will be of  
46  
47 great importance for planning future studies in this area of research.  
48  
49

50  
51  
52 Notwithstanding the existing limitation deriving from the study design and the small sample size,  
53  
54 this project appears unique and original. The role exerted by the interaction between  
55  
56 inflammation and telomeres, and the contribution of medical co-morbidities related to aging in  
57  
58  
59  
60

1  
2  
3 influencing the effect of this interaction, have been hypothesized but never tested in a systematic  
4  
5 manner. Moreover, there is no available data linking these biological markers to the microbiota  
6  
7 derangements. By using an accurate methodology to better characterize the recruited patients,  
8  
9 the synergy between different research groups with renowned and complementary skills allows  
10  
11 for a reliable study concerning the three-sided interplay between telomeres, inflammation, and  
12  
13 microbiota. Obtaining a deeper understanding of the influence exerted on these systems could  
14  
15 help us in developing novel ways of managing these severely disabling conditions.  
16  
17  
18  
19  
20  
21  
22  
23  
24  
25  
26  
27  
28  
29  
30  
31  
32  
33  
34  
35  
36  
37  
38  
39  
40  
41  
42  
43  
44  
45  
46  
47  
48  
49  
50  
51  
52  
53  
54  
55  
56  
57  
58  
59  
60

For peer review only

## References

1. Merikangas KR, Jin R, He J-P, *et al*. Prevalence and correlates of bipolar spectrum disorder in the world mental health survey initiative. *Arch Gen Psychiatry* 2011;**68**:241–51.
2. Roshanaei-Moghaddam B, Katon W. Premature Mortality From General Medical Illnesses Among Persons With Bipolar Disorder: A Review. *Psychiatr Serv* 2009;**60**:147–56.
3. Chesney E, Goodwin GM, Fazel S. Risks of all-cause and suicide mortality in mental disorders: a meta-review. *World psychiatry* 2014;**13**:153–60.
4. Walker ER, McGee RE, Druss BG. Mortality in mental disorders and global disease burden implications: a systematic review and meta-analysis. *JAMA psychiatry* 2015;**72**:334–41.
5. Newcomer JW, Hennekens CH. Severe mental illness and risk of cardiovascular disease. *JAMA* 2007;**298**:1794–6.
6. De Hert M, Correll CU, Bobes J, *et al*. Physical illness in patients with severe mental disorders. I. Prevalence, impact of medications and disparities in health care. *World Psychiatry* 2011;**10**:52–77.
7. Lindqvist D, Epel ES, Mellon SH, *et al*. Psychiatric disorders and leukocyte telomere length: Underlying mechanisms linking mental illness with cellular aging. *Neurosci Biobehav Rev* 2015;**55**:333–64.
8. Young JJ, Bruno D, Pomara N. A review of the relationship between proinflammatory cytokines and major depressive disorder. *J Affect Disord* 2014;**169**:15–20.
9. Leboyer M, Oliveira J, Tamouza R, *et al*. Is it time for immunopsychiatry in psychotic disorders? *Psychopharmacology (Berl)* 2016;**233**:1651–60.
10. Zhang J, Rane G, Dai X, *et al*. Ageing and the telomere connection: An intimate relationship with inflammation. *Ageing Res Rev* 2016;**25**:55–69.
11. Rode L, Nordestgaard BG, Bojesen SE. Peripheral Blood Leukocyte Telomere Length and Mortality Among 64 637 Individuals From the General Population. *JNCI J Natl Cancer Inst* 2015;**107**:dju074.
12. Darrow SM, Verhoeven JE, Révész D, *et al*. The Association Between Psychiatric Disorders and Telomere Length: A Meta-Analysis Involving 14,827 Persons. *Psychosom Med* 2016;**78**:776–87.
13. Révész D, Verhoeven JE, Milaneschi Y, *et al*. Depressive and anxiety disorders and short leukocyte telomere length: mediating effects of metabolic stress and lifestyle factors. *Psychol Med* 2016;**46**:2337–49.
14. Sender R, Fuchs S, Milo R. Revised estimates for the number of human and bacteria cells in the body. *PLoS Biol* 2016;**14**:e1002533.
15. Kasselmann LJ, Vernice NA, DeLeon J, *et al*. The gut microbiome and elevated cardiovascular risk in obesity and autoimmunity. *Atherosclerosis* 2018;**271**:203–13.
16. Cryan JF, Dinan TG. Mind-altering microorganisms: the impact of the gut microbiota on brain and behaviour. *Nat Rev Neurosci* 2012;**13**:701–12.
17. Clarke G, Grenham S, Scully P, *et al*. The microbiome-gut-brain axis during early life regulates the hippocampal serotonergic system in a sex-dependent manner. *Mol Psychiatry* 2013;**18**:666–73.
18. Gareau MG, Wine E, Rodrigues DM, *et al*. Bacterial infection causes stress-induced memory dysfunction in mice. *Gut* 2011;**60**:307–17.
19. Coretti L, Paparo L, Riccio MP, *et al*. Gut Microbiota Features in Young Children With Autism Spectrum Disorders. *Front Microbiol* 2018;**9**.
20. Sharon G, Cruz NJ, Kang D-W, *et al*. Human Gut Microbiota from Autism Spectrum Disorder Promote Behavioral Symptoms in Mice. *Cell* 2019;**177**:1600-1618.e17.
21. Shen Y, Xu J, Li Z, *et al*. Analysis of gut microbiota diversity and auxiliary diagnosis as a biomarker in patients with schizophrenia: A cross-sectional study. *Schizophr Res* 2018;**197**:470–7. doi:10.1016/j.schres.2018.01.002

- 1  
2  
3  
4  
5  
6  
7  
8  
9  
10  
11  
12  
13  
14  
15  
16  
17  
18  
19  
20  
21  
22  
23  
24  
25  
26  
27  
28  
29  
30  
31  
32  
33  
34  
35  
36  
37  
38  
39  
40  
41  
42  
43  
44  
45  
46  
47  
48  
49  
50  
51  
52  
53  
54  
55  
56  
57  
58  
59  
60
- 22 . Dash S, Clarke G, Berk M, *et al.* The gut microbiome and diet in psychiatry: focus on depression. *Curr Opin Psychiatry* 2015;**28**:1–6.
  - 23 . Forsythe P, Bienenstock J. Immunomodulation by Commensal and Probiotic Bacteria. *Immunol Invest* 2010;**39**:429–48.
  - 24 . Alam R, Abdolmaleky HM, Zhou J. Microbiome, inflammation, epigenetic alterations, and mental diseases. *Am J Med Genet Part B Neuropsychiatr Genet* 2017;**174**:651–60.
  - 25 . First MB, Spitzer RL, Gibbon M, *et al.* *Structured Clinical Interview for DSM-IV-TR Axis I Disorders, Research Version, Patient Edition. (SCID-I/P)*. New York: : Biometrics Research, New York State Psychiatric Institute 2002.
  - 26 . American Psychiatric Association. Diagnostic and statistical manual of mental disorders DSM-IV-TR fourth edition (text revision). 2000.
  - 27 . Simon NM, Smoller JW, McNamara KL, *et al.* Telomere shortening and mood disorders: preliminary support for a chronic stress model of accelerated aging. *Biol Psychiatry* 2006;**60**:432–5.
  - 28 . Yuan X, Zhang P, Wang Y, *et al.* Changes in metabolism and microbiota after 24-week risperidone treatment in drug naïve, normal weight patients with first episode schizophrenia. *Schizophr Res* Published Online First: 30 May 2018. doi:10.1016/j.schres.2018.05.017
  - 29 . Souery D, Papakostas GI, Trivedi MH. Treatment-resistant depression. *J Clin Psychiatry* 2006;**67**:16–22.
  - 30 . Kane J, Honigfeld G, Singer J, *et al.* Clozapine for the treatment-resistant schizophrenic: a double-blind comparison with chlorpromazine. *Arch Gen Psychiatry* 1988;**45**:789–96.
  - 31 . Fagerstrom K-O, Schneider NG. Measuring nicotine dependence: a review of the Fagerstrom Tolerance Questionnaire. *J Behav Med* 1989;**12**:159–82.
  - 32 . Kay SR, Fiszbein A, Opler LA. The positive and negative syndrome scale (PANSS) for schizophrenia. *Schizophr Bull* 1987;**13**:261–76.
  - 33 . Haro JM, Kamath SA, Ochoa S, *et al.* The Clinical Global Impression-Schizophrenia scale: a simple instrument to measure the diversity of symptoms present in schizophrenia. *Acta Psychiatr Scand Suppl* 2003;**16**–23.
  - 34 . Pinna F, Bosia M, Cavallaro R, *et al.* Consensus five factor PANSS for evaluation of clinical remission: effects on functioning and cognitive performances. *Schizophr Res Cogn* 2014;**1**:187–92.
  - 35 . Pinna F, Deriu L, Diana E, *et al.* Clinical Global Impression-severity score as a reliable measure for routine evaluation of remission in schizophrenia and schizoaffective disorders. *Ann Gen Psychiatry* 2015;**14**:6.
  - 36 . Grof P, Duffy A, Cavazzoni P, *et al.* Is response to prophylactic lithium a familial trait? *J Clin Psychiatry* 2002;**63**:942–7.
  - 37 . Cantara S, Pisu M, Frau DV, *et al.* Telomere abnormalities and chromosome fragility in patients affected by familial papillary thyroid cancer. *J Clin Endocrinol Metab* 2012;**97**:E1327-31. doi:10.1210/jc.2011-2096
  - 38 . R Core Team. R: A language and environment for statistical computing. R Foundation for Statistical Computing, Vienna, Austria. 2019.
  - 39 . Nguyen TT, Eyster LT, Jeste D V. Systemic biomarkers of accelerated aging in schizophrenia: a critical review and future directions. *Schizophr Bull* 2017;**44**:398–408.
  - 40 . Squassina A, Pisanu C, Corbett N, *et al.* Telomere length in bipolar disorder and lithium response. *Eur Neuropsychopharmacol* 2017;**27**:560–7.
  - 41 . Squassina A, Pisanu C, Vanni R. Mood Disorders, Accelerated Aging, and Inflammation: Is the Link Hidden in Telomeres? *Cells* 2019;**8**:52.
  - 42 . Russo P, Prinzi G, Proietti S, *et al.* Shorter telomere length in schizophrenia: Evidence from a real-



1  
2  
3  
4  
5  
6  
7  
8  
9  
10  
11  
12  
13  
14  
15  
16  
17  
18  
19  
20  
21  
22  
23  
24  
25  
26  
27  
28  
29  
30  
31  
32  
33  
34  
35  
36  
37  
38  
39  
40  
41  
42  
43  
44  
45  
46  
47  
48  
49  
50  
51  
52  
53  
54  
55  
56  
57  
58  
59  
60

world population and meta-analysis of most recent literature. *Schizophr Res* 2018;**202**:37–45.

43 . Huang Y-C, Wang L-J, Tseng P-T, *et al.* Leukocyte telomere length in patients with bipolar disorder: An updated meta-analysis and subgroup analysis by mood status. *Psychiatry Res* 2018;**270**:41–9.

44 . Munkholm K, Vinberg M, Kessing LV. Cytokines in bipolar disorder: a systematic review and meta-analysis. *J Affect Disord* 2013;**144**:16–27.

45 . Peng W, Yi P, Yang J, *et al.* Association of gut microbiota composition and function with a senescence-accelerated mouse model of Alzheimer’s Disease using 16S rRNA gene and metagenomic sequencing analysis. *Aging (Albany NY)* 2018;**10**:4054.

For peer review only

### Author statement

MM contributed to the design of the study protocol and wrote the first draft of the manuscript. PP co-wrote the first draft of the manuscript. AS designed the study protocol and co-wrote the first draft of the manuscript. CA, AB, PC, CC, DC, EC, TD, DF, MG, EM, AM, MAM, Amur, MN, BN, FP, CP, RR, GS, VS, critically revised the manuscript and contributed to the discussion. CChill, BC, MDZ, GLF, RV, contributed to the design of the study protocol and critically revised the manuscript. We wish to thank all the patients who are participating to this study. We also thank the nurses Ms. Flavia Orrù (Unit of Clinical Pharmacology, University Hospital Agency of Cagliari), and Ms. Anna Greca Floris, Mr. Gianluca Carta, Mr. Sergio Deiana, Ms. Gioia Gabriela Delogu, Mr. Giovanni Dessanai, Ms. Maria Elisabetta Loche, Mr. Giampiero Neri, Ms. Maria Cristina Olmi, Ms. Enrica Pintus, Ms. Loredana Satta (Unit of Clinical Psychiatry of the University Hospital Agency of Cagliari) for helping with the recruitment procedures. CP is supported by Fondazione Umberto Veronesi.

### Funding

This work was supported by Fondazione di Sardegna (“Convenzione triennale 2015–2017”) and by the Autonomous Region of Sardinia (“Legge Regionale 7 agosto 2007, n. 7 – call 2016”), grant number F72F16003090002.

### Conflict of interest

The authors of this paper do not have any competing interest in relation with the content of the present study.

**Supplementary Table 1.** Main socio-demographic and clinical characteristics of the sample

| <b>Variable</b>                           | <b>Bipolar disorder<br/>(N=40)</b> | <b>Schizophrenia<br/>(N =36)</b> | <b>Major depressive<br/>disorder (N = 19)</b> | <b>Healthy controls<br/>(N = 28)</b> | <b>Total (N =<br/>123)</b> |
|-------------------------------------------|------------------------------------|----------------------------------|-----------------------------------------------|--------------------------------------|----------------------------|
| Women, N (%)                              | 23 (57.5)                          | 23 (57.5)                        | 12 (63.2)                                     | 11 (39.3)                            | 50 (40.7)                  |
| Men, N (%)                                | 17 (42.5)                          | 32 (88.9)                        | 6 (31.6)                                      | 17 (60.7)                            | 72 (58.5)                  |
| Age (mean ± SD)                           | 51.5±10.7                          | 46.7±12.4                        | 56.1±7.9                                      | 42.5±11.6                            | 48.7±11.9                  |
| Age of onset (mean ± SD)                  | 25.3±9.4                           | 25.6±7.4                         | 33.8±12.0                                     |                                      | 27.1±9.7                   |
| Paternal age at conception (mean ± SD)    | 33.8±5.9                           | 33.2±6.5                         | 33.8±4.7                                      | 33.4±5.7                             | 33.5±5.8                   |
| History of suicide attempt, N (%)         | 11(27.5)                           | 8 (22.5)                         | 2 (16.7)                                      |                                      | 22                         |
| History of violent attempt, N (%)         | 4 (10.0)                           | 1 (2.8)                          | 2 (11.1)                                      |                                      | 7                          |
| Vegan diet, N (%)                         | 2 (5.0)                            | 1 (2.9)                          | 0 (0.0)                                       | 0 (0.0)                              | 3 (2.5)                    |
| Physical activity, N (%)                  | 18 (45.0)                          | 15 (41.7)                        | 5 (27.8)                                      | 20 (71.4)                            | 58 (47.5)                  |
| Metabolic co-morbidity, N (%)             | 13 (32.5)                          | 12 (38.7)                        | 5 (27.8)                                      | 1 (3.6)                              | 31 (25.4)                  |
| Cardiovascular co-morbidity, N (%)        | 6 (15.0)                           | 5 (13.9)                         | 3 (16.7)                                      | 7 (25)                               | 21(17.2)                   |
| Current treatment – lithium, N (%)        | 40 (100)                           | 1 (2.8)                          | 1 (5.6)                                       |                                      |                            |
| Current treatment – antipsychotics, N (%) | 19 (47.5)                          | 36 (100)                         | 4 (22.2)                                      |                                      |                            |
| Current treatment – general, N (%)        | 40 (100)                           | 36 (100)                         | 17 (94.4)                                     |                                      |                            |

SD: standard deviation

# BMJ Open

**A multidisciplinary approach to mental illness: do inflammation, telomere length and microbiota form a loop?  
A protocol for a cross-sectional study on the complex relationship between inflammation, telomere length, gut microbiota and psychiatric disorders**

|                               |                                                                                                                                                                                                                                                                                                                                                                                                                                                                                                                                                                                                                                                                                                                                                                                                                                                                                                                                                                                                                                                                                                                                                                                                                                                                                                                                                                                                                                                                                                                                                                                                                                                                                                                                                                                                                                                                                                                                                                                                                                                                                                                                                                                                                                                                                                      |
|-------------------------------|------------------------------------------------------------------------------------------------------------------------------------------------------------------------------------------------------------------------------------------------------------------------------------------------------------------------------------------------------------------------------------------------------------------------------------------------------------------------------------------------------------------------------------------------------------------------------------------------------------------------------------------------------------------------------------------------------------------------------------------------------------------------------------------------------------------------------------------------------------------------------------------------------------------------------------------------------------------------------------------------------------------------------------------------------------------------------------------------------------------------------------------------------------------------------------------------------------------------------------------------------------------------------------------------------------------------------------------------------------------------------------------------------------------------------------------------------------------------------------------------------------------------------------------------------------------------------------------------------------------------------------------------------------------------------------------------------------------------------------------------------------------------------------------------------------------------------------------------------------------------------------------------------------------------------------------------------------------------------------------------------------------------------------------------------------------------------------------------------------------------------------------------------------------------------------------------------------------------------------------------------------------------------------------------------|
| Journal:                      | <i>BMJ Open</i>                                                                                                                                                                                                                                                                                                                                                                                                                                                                                                                                                                                                                                                                                                                                                                                                                                                                                                                                                                                                                                                                                                                                                                                                                                                                                                                                                                                                                                                                                                                                                                                                                                                                                                                                                                                                                                                                                                                                                                                                                                                                                                                                                                                                                                                                                      |
| Manuscript ID                 | bmjopen-2019-032513.R1                                                                                                                                                                                                                                                                                                                                                                                                                                                                                                                                                                                                                                                                                                                                                                                                                                                                                                                                                                                                                                                                                                                                                                                                                                                                                                                                                                                                                                                                                                                                                                                                                                                                                                                                                                                                                                                                                                                                                                                                                                                                                                                                                                                                                                                                               |
| Article Type:                 | Protocol                                                                                                                                                                                                                                                                                                                                                                                                                                                                                                                                                                                                                                                                                                                                                                                                                                                                                                                                                                                                                                                                                                                                                                                                                                                                                                                                                                                                                                                                                                                                                                                                                                                                                                                                                                                                                                                                                                                                                                                                                                                                                                                                                                                                                                                                                             |
| Date Submitted by the Author: | 13-Dec-2019                                                                                                                                                                                                                                                                                                                                                                                                                                                                                                                                                                                                                                                                                                                                                                                                                                                                                                                                                                                                                                                                                                                                                                                                                                                                                                                                                                                                                                                                                                                                                                                                                                                                                                                                                                                                                                                                                                                                                                                                                                                                                                                                                                                                                                                                                          |
| Complete List of Authors:     | <p>Manchia, Mirko; Dalhousie University, Pharmacology; Università degli Studi di Cagliari, Medical Science and Public Health</p> <p>Paribello, Pasquale; University of Cagliari, Unit of Clinical Psychiatry, University Hospital Agency of Cagliari</p> <p>Arzedi, Carlo; University of Cagliari, Department of Public Health, Clinical and Molecular Medicine</p> <p>Bocchetta, Alberto; University of Cagliari, Biomedical Sciences</p> <p>Caria, Paola; University of Cagliari, Biomedical Sciences</p> <p>Cocco, Cristina; University of Cagliari, Biomedical Sciences</p> <p>Congiu, Donatella; University of Cagliari, Biomedical Sciences</p> <p>Cossu, Eleonora; University of Cagliari, Department of Public Health, Clinical and Molecular Medicine</p> <p>Dettori, Tinuccia; University of Cagliari, Biomedical Sciences</p> <p>Frau, Daniela Virginia; University of Cagliari, Biomedical Sciences</p> <p>Garzilli, Mario; University of Cagliari, Department of Public Health, Clinical and Molecular Medicine</p> <p>Manca, Elias; University of Cagliari, Biomedical Sciences</p> <p>Meloni, Anna; University of Cagliari, Biomedical Sciences</p> <p>Montis, Maria Antonietta; University of Cagliari, Department of Public Health, Clinical and Molecular Medicine</p> <p>Mura, Andrea; University of Cagliari, Department of Public Health, Clinical and Molecular Medicine</p> <p>Nieddu, Mariella; University of Cagliari, Biomedical Sciences</p> <p>Noli, Barbara; University of Cagliari, Biomedical Sciences</p> <p>Pinna, Federica; University of Cagliari Department of Public Health Clinical and Molecular Medicine</p> <p>Pisanu, Claudia; University of Cagliari, Biomedical Sciences</p> <p>Robledo, Renato; University of Cagliari, Department of Biomedical Sciences</p> <p>Severino, Giovanni; University of Cagliari, Biomedical Sciences</p> <p>Sogos, Valeria; University of Cagliari, Biomedical Sciences</p> <p>Chillotti, Caterina; University Hospital Agency of Cagliari, Unit of Clinical Pharmacology</p> <p>Carpiniello, Bernardo; Università degli Studi di Cagliari, Medical Science and Public Health</p> <p>Del Zompo, Maria; University of Cagliari, Biomedical Sciences</p> <p>Ferri, Gian Luca; University of Cagliari, Biomedical Sciences</p> |

1  
2  
3  
4  
5  
6  
7  
8  
9  
10  
11  
12  
13  
14  
15  
16  
17  
18  
19  
20  
21  
22  
23  
24  
25  
26  
27  
28  
29  
30  
31  
32  
33  
34  
35  
36  
37  
38  
39  
40  
41  
42  
43  
44  
45  
46  
47  
48  
49  
50  
51  
52  
53  
54  
55  
56  
57  
58  
59  
60

|                                  |                                                                                                                                |
|----------------------------------|--------------------------------------------------------------------------------------------------------------------------------|
|                                  | Vanni, Roberta; University of Cagliari, Biomedical Sciences<br>Squassina, Alessio; University of Cagliari, Biomedical Sciences |
| <b>Primary Subject Heading</b> : | Mental health                                                                                                                  |
| Secondary Subject Heading:       | Pharmacology and therapeutics                                                                                                  |
| Keywords:                        | biomarker, aging, allostasis, ELISA                                                                                            |
|                                  |                                                                                                                                |

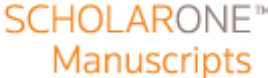

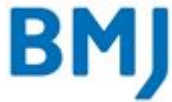

I, the Submitting Author has the right to grant and does grant on behalf of all authors of the Work (as defined in the below author licence), an exclusive licence and/or a non-exclusive licence for contributions from authors who are: i) UK Crown employees; ii) where BMJ has agreed a CC-BY licence shall apply, and/or iii) in accordance with the terms applicable for US Federal Government officers or employees acting as part of their official duties; on a worldwide, perpetual, irrevocable, royalty-free basis to BMJ Publishing Group Ltd ("BMJ") its licensees and where the relevant Journal is co-owned by BMJ to the co-owners of the Journal, to publish the Work in this journal and any other BMJ products and to exploit all rights, as set out in our [licence](#).

The Submitting Author accepts and understands that any supply made under these terms is made by BMJ to the Submitting Author unless you are acting as an employee on behalf of your employer or a postgraduate student of an affiliated institution which is paying any applicable article publishing charge ("APC") for Open Access articles. Where the Submitting Author wishes to make the Work available on an Open Access basis (and intends to pay the relevant APC), the terms of reuse of such Open Access shall be governed by a Creative Commons licence – details of these licences and which [Creative Commons](#) licence will apply to this Work are set out in our licence referred to above.

Other than as permitted in any relevant BMJ Author's Self Archiving Policies, I confirm this Work has not been accepted for publication elsewhere, is not being considered for publication elsewhere and does not duplicate material already published. I confirm all authors consent to publication of this Work and authorise the granting of this licence.

1  
2  
3 **A multidisciplinary approach to mental illness: do inflammation, telomere length and microbiota form**  
4 **a loop? A protocol for a cross-sectional study on the complex relationship between inflammation,**  
5 **telomere length, gut microbiota and psychiatric disorders.**  
6  
7  
8  
9

10  
11  
12 Mirko Manchia<sup>1,2,3</sup>, Pasquale Paribello<sup>1,2</sup>, Carlo Arzedi<sup>1,2</sup>, Alberto Bocchetta<sup>4,5</sup>, Paola Caria<sup>6</sup>, Cristina  
13 Cocco<sup>5</sup>, Donatella Congiu<sup>4</sup>, Eleonora Cossu<sup>1,2</sup>, Tinuccia Dettori<sup>6</sup>, Daniela Virginia Frau<sup>6</sup>, Mario Garzilli<sup>1,2</sup>,  
14 Elias Manca<sup>7</sup>, Anna Meloni<sup>4</sup>, Maria Antonietta Montis<sup>1,2</sup>, Andrea Mura<sup>1,2</sup>, Mariella Nieddu<sup>6</sup>, Barbara Noli<sup>7</sup>,  
15 Federica Pinna<sup>1,2</sup>, Claudia Pisanu<sup>4</sup>, Renato Robledo<sup>6</sup>, Giovanni Severino<sup>4</sup>, Valeria Sogos<sup>8</sup>, Caterina  
16 Chillotti<sup>4,5</sup>, Bernardo Carpiello<sup>1,2</sup>, Maria Del Zompo<sup>4,5</sup>, Gian Luca Ferri<sup>7</sup>, Roberta Vanni<sup>6</sup>, Alessio  
17 Squassina<sup>4\*</sup>  
18  
19  
20  
21  
22  
23  
24  
25  
26  
27  
28  
29

30 <sup>1</sup>Unit of Psychiatry, Department of Public Health, Clinical and Molecular Medicine, University of Cagliari,  
31 Cagliari, Italy; <sup>2</sup>Unit of Clinical Psychiatry, University Hospital Agency of Cagliari, Cagliari, Italy; <sup>3</sup>  
32 Department of Pharmacology, Dalhousie University, Halifax, Nova Scotia, Canada; <sup>4</sup>Department of  
33 Biomedical Sciences, Section of Neuroscience and Clinical Pharmacology, University of Cagliari, Italy; <sup>5</sup>  
34 Unit of Clinical Pharmacology, University Hospital Agency of Cagliari, Italy; <sup>6</sup>Department of Biomedical  
35 Sciences, Unit of Biology and Genetics, University of Cagliari, Italy; <sup>7</sup>Department of Biomedical Sciences,  
36 NEF Laboratory, University of Cagliari, Italy; <sup>8</sup>Department of Biomedical Sciences, Section of  
37 Cytomorphology, University of Cagliari, Monserrato, Italy.  
38  
39  
40  
41  
42  
43  
44  
45  
46  
47  
48  
49  
50

51 \*Correspondence to:

52 Alessio Squassina, PhD  
53  
54  
55  
56  
57  
58  
59  
60

1  
2  
3 Laboratory of Pharmacogenomics, Department of Biomedical Sciences, Section of Neuroscience and  
4

5 Clinical Pharmacology, University of Cagliari, Italy  
6

7  
8 Cittadella Universitaria di Monserrato  
9

10 SP8 Sestu-Monserrato, Km 0.700  
11

12  
13 09042 Cagliari, Italy  
14

15 E-mail address: [squassina@unica.it](mailto:squassina@unica.it)  
16  
17

18  
19  
20 **Word count:** 3,544  
21  
22  
23  
24  
25  
26  
27  
28  
29  
30  
31  
32  
33  
34  
35  
36  
37  
38  
39  
40  
41  
42  
43  
44  
45  
46  
47  
48  
49  
50  
51  
52  
53  
54  
55  
56  
57  
58  
59  
60

For peer review only



## ABSTRACT

**Introduction:** Severe psychiatric disorders are typically associated with a significant reduction in life expectancy compared to the general population. Among the different hypotheses formulated to explain this observation, accelerated aging has been increasingly recognized as the main culprit. At the same time, telomere shortening is becoming widely accepted as a proxy molecular marker of aging. The present study aims to fill a gap in the literature by better defining the complex interaction/s between inflammation, age-related co-morbidities, telomere shortening and gut microbiota in psychiatric disorders.

**Methods and analysis:** A cross-sectional study is proposed, recruiting 40 patients for each of three different diagnostic categories (bipolar disorder, schizophrenia, major depressive disorder) treated at the Section of Psychiatry and at the Unit of Clinical Pharmacology of the University Hospital Agency of Cagliari (Italy), compared to 40 age and sex matched non-psychiatric controls. Each group includes individuals suffering, or not, from age-related co-morbidities, to account for the impact of these medical conditions on the biological make-up of recruited patients. The inflammatory state, microbiota composition, and the leukocytes telomere length (LTL) are assessed.

**Ethics and dissemination:** The study protocol was approved by the Ethics Committee of the University Hospital Agency of Cagliari (PG/2018/11693, September 5<sup>th</sup>, 2018). The study is conducted in accordance with the principles of good clinical practice, and the Declaration of Helsinki, and in compliance with the relevant Italian national legislation. Written, informed consent is obtained from all participants. Participation to the study is on a voluntary basis only. Patients will be part of the dissemination phase of the study results, during which a local conference will be organized and families of patients will also be involved. Moreover, findings will

1  
2  
3 be published in one or more research papers, and presented at national and international  
4  
5 conferences, in posters or oral communications.  
6  
7  
8  
9  
10  
11  
12

13  
14 **Keywords:** biomarker; aging; allostasis; ELISA;  
15  
16  
17  
18  
19  
20  
21  
22  
23  
24  
25  
26  
27  
28  
29  
30  
31  
32  
33  
34  
35  
36  
37  
38  
39  
40  
41  
42  
43  
44  
45  
46  
47  
48  
49  
50  
51  
52  
53  
54  
55  
56  
57  
58  
59  
60

For peer review only

1  
2  
3  
4  
5  
6  
7  
8  
9  
10  
11  
12  
13  
14  
15  
16  
17  
18  
19  
20  
21  
22  
23  
24  
25  
26  
27  
28  
29  
30  
31  
32  
33  
34  
35  
36  
37  
38  
39  
40  
41  
42  
43  
44  
45  
46  
47  
48  
49  
50  
51  
52  
53  
54  
55  
56  
57  
58  
59  
60

## Article summary

### Strengths and limitations of this study

- This is a novel approach proposing a systematic investigation of the complex interplay between inflammation, microbiota, and telomere shortening in modulating the liability for major psychiatric disorders.
- The balanced recruitment of individuals affected and unaffected by age-related co-morbidities among the 4 study groups, allows for a clearer definition of the possible confounding effects of these chronic medical conditions on telomere shortening, inflammatory status, and microbiota composition.
- The cross-sectional design does not allow for a causal inference of any possible finding on the explored psychiatric conditions, as these may simply represent epiphenomena of these disorders.
- The small sample size and the relatively restricted catchment area may limit the generalizability of the results.

## Introduction

Bipolar disorder (BD) is a severe and chronic psychiatric disorder characterized by alternating manic and depressive episodes interspersed with periods of well-being. Its prevalence in the general population ranges from 0.8 to 1.2%<sup>1</sup> and is associated with high levels of disability and premature mortality<sup>2</sup>. Indeed, BD patients have a 10 to 20 years reduction in their life expectancy compared to the general population, an epidemiological mark shared with other severe mental disorders, including schizophrenia (SCZ) and major depressive disorder (MDD).<sup>3</sup> Both disorders are clinically severe, with SCZ characterized by positive symptoms such as delusions and hallucinations, negative symptoms (with avolition and social withdrawal) and significant permanent cognitive impairment<sup>4</sup>, and MDD by single or recurrent episodes of low mood and decreased energy often associated with high levels of anxiety and cognitive impairment<sup>5</sup>. A vast body of data suggests that the excess mortality of these severe psychiatric disorders is accounted for by a higher prevalence of co-morbid chronic somatic disorders compared to individuals without mental illnesses<sup>6</sup>. In fact, age-related illnesses, such as cardiovascular and metabolic disorders, whose pathophysiology carries an inflammatory component, present a significantly higher incidence in psychiatric patients than in the general population<sup>7,8</sup>. This evidence has led to the hypothesis that accelerated aging and inflammation may play a central role in the etiopathogenesis of mental disorders. Biological signatures of these events are represented by telomere shortening (TS) and increased levels of pro-inflammatory markers. Several studies have reported shorter leukocyte telomere length (LTL) as well as increased levels of circulating pro-inflammatory cytokines in BD, SCZ, and MDD patients compared to controls<sup>9-11</sup>, suggesting that the interaction and crosstalk between these two biological pathways might play a central role in the neurobiology of psychiatric disorders. Telomere shortening is a hallmark of cellular aging, and while telomere length reduces with each cell division, the shortening rate is increased by allostatic load and inflammation,<sup>12</sup> thus affecting the ageing process. Consistently, a

1  
2  
3 recent study evaluating mortality in more than 64,000 subjects from the general population, showed  
4  
5 that short telomeres in peripheral blood leukocytes were associated with high mortality<sup>13</sup>. So far,  
6  
7 findings of shorter telomeres in psychiatric patients have been contradictory,<sup>14</sup> likely due to  
8  
9 underpowered study samples and limitations in methodologies, while the interaction between  
10  
11 inflammatory processes, telomeres shortening and psychiatric disorders has been scarcely investigated.  
12  
13 There is evidence that pro-inflammatory cytokines are important mediators of the association between  
14  
15 depressive and anxiety disorders and LTL<sup>15</sup>. Moreover, the impact of co-morbid age-related disorders  
16  
17 has been often overlooked in previous telomere studies in psychiatry. Although current data suggest  
18  
19 that TS, inflammation and accelerated aging may play a central role in modulating the liability for severe  
20  
21 psychiatric disorders, differences and similarities in their involvement in mental illnesses have yet to be  
22  
23 elucidated and therefore need comprehensive investigations.  
24  
25  
26  
27  
28  
29

30  
31 Alterations of these biological pathways in severe psychiatric disorders might also influence other  
32  
33 relevant physiological components. It is known that an estimate of 40,000 bacterial species and 1,800  
34  
35 phyla inhabits our body, paralleling the number of human cells, and approaching a ratio of nearly 1:1  
36  
37 according to recent estimates<sup>16</sup>. As a whole, the microorganisms living in our body are collectively  
38  
39 referred to as microbiota, and include bacteria, fungi and protozoa. The microbiota serves multiple  
40  
41 physiological functions, although its overall importance has not been fully grasped yet. A state of balance  
42  
43 between “good” bacteria and “harmful” bacteria (called “eubiosis”) is therefore paramount to maintain  
44  
45 the homeostasis of its hosting organism. On the other hand, the perturbation of this balance (called  
46  
47 “disbiosis”) is related to the development of several pathological conditions. For example, the  
48  
49 microbiota works synergistically with the immune system to avoid colonization from pathogenic bacteria  
50  
51 and viruses. The microbiota also plays a role in metabolism, participating in the digestion by aiding  
52  
53  
54  
55  
56  
57  
58  
59  
60

1  
2  
3 micronutrients absorption (in particular amino acids and short-chain fatty acids), and part of their further  
4  
5 degradation as well.  
6  
7

8  
9 Although dysbiosis has been clearly associated with numerous ailments, it is not clear whether a causal  
10  
11 relationship exists between these two phenomena or, instead, if anomalies in the microbiota  
12  
13 composition represent an epiphenomenon of the underlying pathological processes. Similarly, the  
14  
15 eventual preemptive or even therapeutic effects deriving from the microbiota manipulation remain  
16  
17 unclear. However, there is now consisting evidence that the microbiota, particularly gut microbiota,  
18  
19 exerts a modulatory function on the brain, possibly even modulating behavior<sup>17</sup>. Indeed, experimental  
20  
21 data in animal models show that CNS neurotransmission can be profoundly disturbed by the absence of  
22  
23 a normal gut microbiota<sup>18</sup> and that alterations of eubiosis with induced acute bacterial infection might  
24  
25 induce cognitive alterations<sup>19</sup>. In humans, data have correlated alterations of microbiota with the  
26  
27 manifestation of autism spectrum disorder (ASD)<sup>20</sup>. Interestingly, a recent translational study operated  
28  
29 transplants of gut microbiota from human donors with ASD controls into germ-free mice revealing that  
30  
31 colonization with ASD microbiota was sufficient to induce hallmark autistic behaviors<sup>21</sup>. Other severe  
32  
33 psychiatric disorders, such as SCZ<sup>22</sup> and MDD<sup>23</sup> show substantial microbiota imbalances. Relevant to this  
34  
35 study protocol is the evidence that a proportion of this altered gut–brain communication in severe  
36  
37 mental disorders, determined by a pathological microbiota, is determined through an  
38  
39 immunomodulatory action, which includes a raise in the activity of inflammatory pathways<sup>24</sup>.  
40  
41  
42  
43  
44  
45  
46  
47  
48  
49  
50

### 51 **Study objectives**

52  
53 The main objective of the present protocol is to clarify the relationship between LTL and  
54  
55 inflammation in the etiopathogenesis of BD, SCZ and MDD. Furthermore, we evaluate the impact  
56  
57 of the age-related medical co-morbidities on these biological markers. Contextually, we aim to  
58  
59  
60

1  
2  
3 determine the presence of alterations in the gut microbiota composition in individuals affected by  
4  
5 SCZ, MDD and BD, as compared with healthy controls (HC). As reported above, several lines of  
6  
7 evidence suggest that the microbiota might play a significant role on the brain-gut axis, and  
8  
9 microbial derangement may result in the development of several psychiatric conditions.<sup>25</sup>  
10  
11

12  
13 Specifically, our study tests the following primary and secondary hypotheses:  
14

15  
16 Primary:

- 17  
18 • To determine the differences in LTL among individuals affected by SCZ, MDD, BD and HC;
- 19  
20  
21 • To test for the presence of differences in inflammatory markers among patients affected by SCZ,  
22  
23 MDD, BD and HC;
- 24  
25  
26 • To assess whether microbiota composition differs among individuals affected by SCZ, MDD, BD  
27  
28 and HC.  
29  
30

31  
32 Secondary:

- 33  
34  
35 • To clarify the impact of medical co-morbidities related to aging on the differences in LTL and in  
36  
37 the number of short telomeres, as well as on inflammatory markers levels and on microbiota;  
38  
39  
40  
41  
42  
43  
44  
45  
46  
47  
48  
49  
50  
51  
52  
53  
54  
55  
56  
57  
58  
59  
60

## Methods

### Study design

This is a cross-sectional study in the context of which we are performing the recruitment of three cohorts, each comprised of 40 patients affected by SCZ, MDD, and BD diagnosed with the Italian version of the Structured Clinical Interview for DSMIV-TR Axis I Disorders (SCID)<sup>26</sup>. In addition, we are recruiting a sample of 40 HC.

### Patient and Public involvement.

There was no involvement of patients in the development of this study protocol. The patients were asked to report their impression on the time required to participate in the study and the burden of the sample procedure as well. An effort is constantly made to facilitate the participation of the eligible individuals, taking into account their indications and minimizing the potential disruption given sampling procedures. Patients were not involved in the development of the recruitment process, but they will be part of the dissemination phase of the study results.

### Recruitment process

The sample is recruited from patients followed-up and treated at the community mental health centre of the Section of Psychiatry of the Department of Medical Science and Public Health, University of Cagliari and University Hospital Agency of Cagliari and the Unit of Clinical Pharmacology, University Hospital Agency, Cagliari, Italy. The recruitment process is performed on the basis of the presence or absence of medical co-morbidities related to aging (e.g. cardiovascular diseases, diabetes mellitus type 2, etc). Approximately half of the subjects for each group are recruited on the basis of the presence of such co-morbidities. Healthy controls are recruited by word of mouth among hospital staff, their families, and



1  
2  
3  
4  
5  
6  
7  
8  
9  
10  
11  
12  
13  
14  
15  
16  
17  
18  
19  
20  
21  
22  
23  
24  
25  
26  
27  
28  
29  
30  
31  
32  
33  
34  
35  
36  
37  
38  
39  
40  
41  
42  
43  
44  
45  
46  
47  
48  
49  
50  
51  
52  
53  
54  
55  
56  
57  
58  
59  
60

university students. Further, they will undergo a standard medical and laboratory test (including CBC, liver and kidney function) to verify their health status.

### **Inclusion and exclusion criteria**

The recruitment process is based on the following inclusion criteria: 1) patients affected by SCZ, BD, MDD according to DSM IV-TR<sup>27</sup> criteria; 2) able to express a consent to participate formulated by signing the consent form; 3) age between 18 and 70 years-old; 4) in euthymic phases for BD and MDD and with at least the six months of stability before recruitment for SCZ. We also apply the following exclusion criteria: 1) presence of acute infections; 2) presence of chronic autoimmune inflammatory conditions (e.g. rheumatoid arthritis, thyroiditis); 3) presence of eating disorders; 4) presence of post-traumatic stress disorder; 5) presence of current substance use disorders; 6) presence of neurological disorders; 7) past traumatic brain injury; 8) presence of severe co-morbidities that may influence molecular testing (such as cancer, HIV infection). The inclusion criteria for HC comprise: 1) the absence of a personal history of mental disorders, 2) the willingness to participate in the study, 3) absence of acute infections; 4) absence of chronic autoimmune inflammatory conditions (e.g. rheumatoid arthritis, thyroiditis); 5) absence of past traumatic brain injury; 6) absence of severe co-morbidities that may influence molecular testing (such as cancer, HIV infection). In addition to the above exclusions criteria for HC and patients, the following are considered in relation to the microbiota study: use of antibiotics in the three months preceding the sampling procedure, chronic use of probiotics.

### **Sample size estimation**

Considering the magnitude of the effect size reported in the literature regarding the correlation between LTL and mood disorders (Cohen  $d=0.67$ <sup>28</sup>), our sample has an 85% statistical power to

1  
2  
3 identify the existing differences between the diagnostic groups (SCZ, BD, MDD) and HC at an  $\alpha =$   
4  
5 0.05. Even if the microbiota analysis remains mainly exploratory it is important to note that  
6  
7 previous research was performed in samples of comparable size both for SCZ<sup>29</sup> and for MDD<sup>30</sup>.  
8  
9

### 10 11 12 13 **Clinical assessment**

14  
15 Recruited subjects are assessed by trained mental-health professionals (psychiatry residents or senior  
16  
17 clinical staff). Clinical information is collected through direct interview of the patient as well as through a  
18  
19 systematic assessment of existing medical records. Whenever possible we are collecting collateral  
20  
21 information from at least one first degree relative or significant other, after obtaining the consent from  
22  
23 the participant. Specific to patients' groups are the following clinical data: age of onset, history of suicide  
24  
25 attempt, history of violent attempt, type of onset, number of episodes, including depressive,  
26  
27 hypomanic/manic, mixed recurrences (for BD and MDD), family history of psychiatric disorders, presence  
28  
29 of past and current substance and/or alcohol use disorder, past and current pharmacological treatments,  
30  
31 duration of pharmacological treatment, type of drugs. Treatment resistance for MDD and SCZ patients is  
32  
33 defined according to the criteria of Souery et al.<sup>31</sup> and Kane et al.<sup>32</sup>, and is based on the clinical course  
34  
35 and evaluation of treatment response patterns. In addition, we are collecting, for patients and HC,  
36  
37 detailed data on the presence of past and current cigarette smoking status, number of cigarettes per day  
38  
39 (categorized according to Fagerström criteria<sup>33</sup>), height, weight, body mass index, cardiovascular and  
40  
41 metabolic co-morbidity, presence of physical activity. We are also gathering data on diet, as this is  
42  
43 relevant to the analysis of microbiota, by asking participants to complete the food frequently  
44  
45 questionnaires (FFQ) and 72 hours narrative summary of dietary intake prior to sampling, based on  
46  
47 which all subjects will be characterized as belonging to one or more of the following categories:  
48  
49  
50  
51  
52  
53  
54  
55  
56  
57 Mediterranean, junk food, high meat consumption, high consumption of baked products, high  
58  
59  
60

1  
2  
3 carbohydrates diet, vegetarian, and vegan. Finally, for HC, the screening study visit includes a clinical  
4  
5 interview (1 ½ hrs long). Each subject will be interviewed using the Italian version of the SCID-I/NP<sup>26</sup> to  
6  
7  
8 rule out the presence of Axis I psychiatric disorders.  
9

### 10 11 12 **Psychopathological measures**

13  
14  
15 Some psychopathological measures are used to establish the stability of the illness at the moment of  
16  
17 recruitment: the Positive and Negative Scale for Schizophrenia (PANSS)<sup>34</sup> and the Clinical Global  
18  
19 Impression Scale for Schizophrenia (CGI-SCH)<sup>35</sup>, which have both shown to be valid assessment tools for  
20  
21 the identification of patients in remission, particularly in routine clinical practice<sup>36,37</sup>. In BD patients we  
22  
23 assess the response to mood stabilizers using the "Retrospective Criteria of Long-Term Treatment  
24  
25 Response in Research Subjects with Bipolar Disorder" scale<sup>38</sup>.  
26  
27  
28  
29  
30  
31

### 32 **Blood sampling and assay procedures**

33  
34 Fasting peripheral venous blood samples are taken from all patients within a similar time window ( 8:00  
35  
36 to 10:00 AM). Blood samples will be collected in an euthymic phase (for MDD and BD patients), or at  
37  
38 least 6 months after their latest exacerbation of psychopathological symptoms (for SCZ patients).  
39  
40 Specimens will be divided in 3 aliquots: (1) for measurement of plasma C-reactive protein (high  
41  
42 sensitivity CRP assay) and the proinflammatory cytokines TNF- $\alpha$  and IL-6, using enzyme-linked  
43  
44 immunosorbent assays (ELISA); (2) for DNA extraction and the subsequent measurement of LTL with  
45  
46 qPCR, performed according to the method described by Cawthon<sup>39</sup>; (3) for measurement of telomere  
47  
48 length using Quantitative Fluorescent in situ hybridization (qFISH) on the metaphase chromosomes in  
49  
50 lymphocytes, carried out as described in Cantara et al.<sup>40</sup>.  
51  
52  
53  
54  
55  
56  
57  
58  
59  
60

## **Fecal microbiota analysis methods**

The 16S RNA Microbial Profiling is a test capable of exploiting the recent technological advances of metagenomic in microbiota ecology: it is based on the sequencing of the regions V3 and V4 of the 16S rRNA (the gene responsible for the production of the prokaryote small ribosomal subunit), a gene which represents an important marker widely used in bacterial taxonomy. Starting from biological material (a stool sample) we are isolating bacterial DNA using the QIAamp DNA Stool Mini Kit (Qiagen, Milan, Italy). DNA is then employed for amplification of the V3–V4 hypervariable regions of the bacterial 16S ribosomal RNA (rRNA) with Next Generation Sequencing using a MiSeq Instrument (Illumina Inc., San Diego, CA, USA), as previously described<sup>41</sup>. The analysis is completed thereafter by sequencing the 16S rRNA gene pool corresponding to the different microorganisms present in the microbiota, subsequently identified through the use of bioinformatic tools (Metagenomics Illumina Inc. and Kraken APP).

## **Data analysis plan**

The association between LTL or cytokine levels and demographic/clinical variables is tested using parametric or non-parametric tests according to the observed distribution. The presence of statistically significant differences in the LTL and in the cytokine plasma levels among the different study groups (SCZ, BD, MDD, HC) is tested through linear regression. Furthermore, the presence of medical co-morbidities related to aging, and the other demographic and clinical variables significantly associated with the outcome are inserted in the regression model. The analyses will be conducted using R<sup>42</sup> and IBM Statistical Package for Social Science (SPSS®). As for the microbiota analysis, the position, dispersion and shape indexes will be calculated for the

1  
2  
3 quantitative variables, whilst the relative frequency for each class will be calculated for categorical  
4  
5 variables. In addition, the correlations between the different analyzed variables will be evaluated  
6  
7  
8 by employing the aforementioned univariate and multivariate analysis methods.  
9

## 10 11 12 13 **Ethics and dissemination**

14  
15 Ethics, consent and permissions

16  
17  
18 This study protocol was approved by the Ethics Committee of the University Hospital Agency of  
19  
20 Cagliari (PG/2018/11693) on September 5<sup>th</sup>, 2018. The study is conducted in accordance with the  
21  
22 principles of good clinical practice, with the Declaration of Helsinki and in compliance with the  
23  
24 national legislation. Written, informed consent is being obtained from all participants.  
25

26  
27 Participation to the study is voluntary and patients may be able to withdraw consent at any point  
28  
29 with no disadvantage to their treatments. A psychiatric assessment establishes that patients'  
30  
31 ability to consent is not compromised by their psychopathological status.  
32  
33  
34  
35  
36

37  
38 Dissemination

39  
40 We plan to describe the main findings of the study to the participants and their families organizing  
41  
42 a local conference using lay language. Moreover, we will also organize a public event open to the  
43  
44 community where we will explain and discuss the potential impact of the findings of our project  
45  
46 on the management of bipolar disorder. Findings will also be published in one or more research  
47  
48 papers, and presented at national and international conferences, in posters or oral  
49  
50  
51 communications.  
52  
53  
54  
55

56  
57 **Status of recruitment**  
58  
59  
60

1  
2  
3 The enrollment of patients and controls started on January 2019. Collection of clinical data and  
4  
5 biological samples is currently undergoing and at the moment of the preparation of the protocol  
6  
7  
8 87% of the sample has been recruited (104/120). Clinical data have been already cleaned and  
9  
10 inputted into a database in preparation of data analysis. The main socio-demographic and clinical  
11  
12 characteristics for the BD, MDD, SCZ and HC samples are summarized in Supplementary Table 1.  
13  
14  
15 The planned end date for the study is February 29<sup>th</sup> 2020.  
16  
17  
18  
19  
20  
21  
22  
23  
24  
25  
26  
27  
28  
29  
30  
31  
32  
33  
34  
35  
36  
37  
38  
39  
40  
41  
42  
43  
44  
45  
46  
47  
48  
49  
50  
51  
52  
53  
54  
55  
56  
57  
58  
59  
60

For peer review only

## Discussion

In this study, we sought to explore the relationship between telomere length, inflammation, the microbiota and the impact of their interaction on the risk of developing a severe mental disorder such as SCZ, BD or MDD. In addition, a corollary objective is to establish similarities and differences in how abnormal molecular dynamics among telomeres, inflammation and microbiota manifest in SCZ, BD, MDD. A novel approach in our study is to ascertain the impact of the age-related medical co-morbidities on such molecular dynamics. Previous research has shown that accelerated biological aging is a hallmark of severe psychiatric disorders<sup>43–45</sup>. Molecular signatures of this accelerated decay are currently being identified and point to TS as well as to a series of inflammatory markers. In the case of SCZ, a recent meta-analysis has found that SCZ patients have a highly statistically significant shortening of LTL compared to HC<sup>46</sup>. Further, a recent qualitative synthesis of the literature has found that consisting evidence points to elevated levels of pro-inflammatory cytokines and chemokines in SCZ, including interleukin (IL)- IL-1 $\beta$ , tumor necrosis factor alpha (TNF $\alpha$ ), Eotaxin-1, Eotaxin-2, monocyte chemoattractant protein-1, macrophage inflammatory protein-1 $\beta$ , thymus- and activation-regulated chemokine, macrophage-derived chemokine, as well as a decline in the levels of the anti-inflammatory cytokine IL-2<sup>43</sup>. In BD patients there is evidence of a significant LTL shortening compared to HC irrespective of mood-state<sup>47</sup>. Similarly to SCZ, the inflammatory patterns in BD are characterized by increased levels of TNF- $\alpha$ , the soluble tumor necrosis factor receptor type 1 (sTNF-R1) and the soluble interleukin-2 receptor (sIL-2R) compared to HC<sup>48</sup>. Of note, there are intriguing findings, although still at the level of experimental pre-clinical data, suggesting that perturbations of the gut microbiota composition and the functional metagenome may be associated with accelerated aging in animal models<sup>49</sup>. In summary, the literature shows that: 1) there is a plausible interaction between

1  
2  
3 inflammation and TS in modulating the risk of severe psychiatric disorders, and 2) this association  
4 might reflect (or be modulated) by specific detrimental alterations of the microbiota. However,  
5  
6 available data also tell that: 1) no previous studies have so far examined the role of confounders  
7  
8 (mainly the presence of age-related medical co-morbidities) in influencing the dynamics between  
9  
10 accelerated biological aging and inflammation in psychiatric disorders, and 2) there is a gap in the  
11  
12 knowledge on how microbiota might influence these dynamics in humans.  
13  
14  
15

16  
17 Our project has been set in this context. We expect to demonstrate that a shortening of LTL  
18  
19 and/or a higher number of short telomeres will be present in the diagnostic groups (SCZ, MDD,  
20  
21 BD) as compared with HC. We also expect that the pro-inflammatory cytokines levels will be  
22  
23 higher among patients and will be negatively correlated with the LTL. Further, we anticipate that  
24  
25 patients with medical co-morbidities related to aging will present shorter telomeres and higher  
26  
27 pro-inflammatory cytokines levels as compared with patients bereft of such co-morbidities.  
28  
29

30  
31 Finally, we expect to identify specific microbiota clusters associated with the diagnostic groups  
32  
33 (SCZ, BD, MDD) and related to specific biological markers of inflammation and accelerated aging.  
34  
35

36  
37 Clearly, our study findings will need to be interpreted in the context of several limitations. First,  
38  
39 due to the cross-sectional design, we will not be able to establish causality (i.e. whether biological  
40  
41 markers of aging resulted from an increased inflammatory load or vice versa). Due to the  
42  
43 relatively small sample size, our study should be considered as hypothesis generator, capable of  
44  
45 clarifying the association strength between the different variables. The resulting data will be of  
46  
47 great importance for planning future studies in this area of research.  
48  
49

50  
51 Notwithstanding the existing limitation deriving from the study design and the small sample size,  
52  
53 this project appears unique and original. The role exerted by the interaction between  
54  
55 inflammation and telomeres, and the contribution of medical co-morbidities related to aging in  
56  
57  
58  
59  
60



1  
2  
3 influencing the effect of this interaction, have been hypothesized but never tested in a systematic  
4  
5 manner. Moreover, there is no available data linking these biological markers to the microbiota  
6  
7 derangements. By using an accurate methodology to better characterize the recruited patients,  
8  
9 the synergy between different research groups with renowned and complementary skills allows  
10  
11 for a reliable study concerning the three-sided interplay between telomeres, inflammation, and  
12  
13 microbiota. Obtaining a deeper understanding of the influence exerted on these systems could  
14  
15 help us in developing novel ways of managing these severely disabling conditions.  
16  
17  
18  
19  
20  
21  
22  
23  
24  
25  
26  
27  
28  
29  
30  
31  
32  
33  
34  
35  
36  
37  
38  
39  
40  
41  
42  
43  
44  
45  
46  
47  
48  
49  
50  
51  
52  
53  
54  
55  
56  
57  
58  
59  
60

For peer review only

## References

1. Merikangas KR, Jin R, He J-P, *et al.* Prevalence and correlates of bipolar spectrum disorder in the world mental health survey initiative. *Arch Gen Psychiatry* 2011;**68**:241–51.
2. Roshanaei-Moghaddam B, Katon W. Premature Mortality From General Medical Illnesses Among Persons With Bipolar Disorder: A Review. *Psychiatr Serv* 2009;**60**:147–56. doi:10.1176/ps.2009.60.2.147
3. Chesney E, Goodwin GM, Fazel S. Risks of all-cause and suicide mortality in mental disorders: a meta-review. *World psychiatry* 2014;**13**:153–60.
4. Owen MJ, Sawa A, Mortensen PB. Schizophrenia. *Lancet* 2016;**388**:86–97.
5. Malhi GS, Mann JJ. Depression. *Lancet (London, England)* 2018;**392**:2299–312. doi:10.1016/S0140-6736(18)31948-2
6. Walker ER, McGee RE, Druss BG. Mortality in mental disorders and global disease burden implications: a systematic review and meta-analysis. *JAMA psychiatry* 2015;**72**:334–41.
7. Newcomer JW, Hennekens CH. Severe mental illness and risk of cardiovascular disease. *JAMA* 2007;**298**:1794–6. doi:298/15/1794 [pii] 10.1001/jama.298.15.1794
8. De Hert M, Correll CU, Bobes J, *et al.* Physical illness in patients with severe mental disorders. I. Prevalence, impact of medications and disparities in health care. *World Psychiatry* 2011;**10**:52–77.
9. Lindqvist D, Epel ES, Mellon SH, *et al.* Psychiatric disorders and leukocyte telomere length: Underlying mechanisms linking mental illness with cellular aging. *Neurosci Biobehav Rev* 2015;**55**:333–64.
10. Young JJ, Bruno D, Pomara N. A review of the relationship between proinflammatory cytokines and major depressive disorder. *J Affect Disord* 2014;**169**:15–20.
11. Leboyer M, Oliveira J, Tamouza R, *et al.* Is it time for immunopsychiatry in psychotic disorders? *Psychopharmacology (Berl)* 2016;**233**:1651–60.
12. Zhang J, Rane G, Dai X, *et al.* Ageing and the telomere connection: An intimate relationship with inflammation. *Ageing Res Rev* 2016;**25**:55–69.
13. Rode L, Nordestgaard BG, Bojesen SE. Peripheral Blood Leukocyte Telomere Length and Mortality Among 64 637 Individuals From the General Population. *JNCI J Natl Cancer Inst* 2015;**107**:djv074.
14. Darrow SM, Verhoeven JE, Révész D, *et al.* The Association Between Psychiatric Disorders and Telomere Length: A Meta-Analysis Involving 14,827 Persons. *Psychosom Med* 2016;**78**:776–87.
15. Révész D, Verhoeven JE, Milaneschi Y, *et al.* Depressive and anxiety disorders and short leukocyte telomere length: mediating effects of metabolic stress and lifestyle factors. *Psychol Med* 2016;**46**:2337–49.
16. Sender R, Fuchs S, Milo R. Revised estimates for the number of human and bacteria cells in the body. *PLoS Biol* 2016;**14**:e1002533.
17. Cryan JF, Dinan TG. Mind-altering microorganisms: the impact of the gut microbiota on brain and behaviour. *Nat Rev Neurosci* 2012;**13**:701–12. doi:10.1038/nrn3346
18. Clarke G, Grenham S, Scully P, *et al.* The microbiome-gut-brain axis during early life regulates the hippocampal serotonergic system in a sex-dependent manner. *Mol Psychiatry* 2013;**18**:666–73.
19. Gareau MG, Wine E, Rodrigues DM, *et al.* Bacterial infection causes stress-induced memory dysfunction in mice. *Gut* 2011;**60**:307–17.
20. Coretti L, Paparo L, Riccio MP, *et al.* Gut Microbiota Features in Young Children With Autism Spectrum Disorders. *Front Microbiol* 2018;**9**.
21. Sharon G, Cruz NJ, Kang D-W, *et al.* Human Gut Microbiota from Autism Spectrum Disorder Promote Behavioral Symptoms in Mice. *Cell* 2019;**177**:1600-1618.e17.
22. Shen Y, Xu J, Li Z, *et al.* Analysis of gut microbiota diversity and auxiliary diagnosis as a biomarker

1  
2  
3  
4  
5  
6  
7  
8  
9  
10  
11  
12  
13  
14  
15  
16  
17  
18  
19  
20  
21  
22  
23  
24  
25  
26  
27  
28  
29  
30  
31  
32  
33  
34  
35  
36  
37  
38  
39  
40  
41  
42  
43  
44  
45  
46  
47  
48  
49  
50  
51  
52  
53  
54  
55  
56  
57  
58  
59  
60

in patients with schizophrenia: A cross-sectional study. *Schizophr Res* 2018;**197**:470–7.

- 23 . Dash S, Clarke G, Berk M, *et al.* The gut microbiome and diet in psychiatry: focus on depression. *Curr Opin Psychiatry* 2015;**28**:1–6.
- 24 . Forsythe P, Bienenstock J. Immunomodulation by Commensal and Probiotic Bacteria. *Immunol Invest* 2010;**39**:429–48.
- 25 . Alam R, Abdolmaleky HM, Zhou J. Microbiome, inflammation, epigenetic alterations, and mental diseases. *Am J Med Genet Part B Neuropsychiatr Genet* 2017;**174**:651–60.
- 26 . First MB, Spitzer RL, Gibbon M, *et al.* *Structured Clinical Interview for DSM-IV-TR Axis I Disorders, Research Version, Patient Edition. (SCID-I/P)*. New York: : Biometrics Research, New York State Psychiatric Institute 2002.
- 27 . American Psychiatric Association. Diagnostic and statistical manual of mental disorders DSM-IV-TR fourth edition (text revision). 2000.
- 28 . Simon NM, Smoller JW, McNamara KL, *et al.* Telomere shortening and mood disorders: preliminary support for a chronic stress model of accelerated aging. *Biol Psychiatry* 2006;**60**:432–5.
- 29 . Yuan X, Zhang P, Wang Y, *et al.* Changes in metabolism and microbiota after 24-week risperidone treatment in drug naïve, normal weight patients with first episode schizophrenia. *Schizophr Res* Published Online First: 30 May 2018.
- 30 . Cheung S, Goldenthal AR, Uhlemann A-C, *et al.* Systematic review of gut microbiota and major depression. *Front psychiatry* 2019;**10**:34.
- 31 . Souery D, Papakostas GI, Trivedi MH. Treatment-resistant depression. *J Clin Psychiatry* 2006;**67**:16–22.
- 32 . Kane J, Honigfeld G, Singer J, *et al.* Clozapine for the treatment-resistant schizophrenic: a double-blind comparison with chlorpromazine. *Arch Gen Psychiatry* 1988;**45**:789–96.
- 33 . Fagerstrom K-O, Schneider NG. Measuring nicotine dependence: a review of the Fagerstrom Tolerance Questionnaire. *J Behav Med* 1989;**12**:159–82.
- 34 . Kay SR, Fiszbein A, Opler LA. The positive and negative syndrome scale (PANSS) for schizophrenia. *SchizophrBull* 1987;**13**:261–76.
- 35 . Haro JM, Kamath SA, Ochoa S, *et al.* The Clinical Global Impression-Schizophrenia scale: a simple instrument to measure the diversity of symptoms present in schizophrenia. *Acta PsychiatrScandSuppl* 2003;**16**–23.
- 36 . Pinna F, Bosia M, Cavallaro R, *et al.* Consensus five factor PANSS for evaluation of clinical remission: effects on functioning and cognitive performances. *Schizophr Res Cogn* 2014;**1**:187–92.
- 37 . Pinna F, Deriu L, Diana E, *et al.* Clinical Global Impression-severity score as a reliable measure for routine evaluation of remission in schizophrenia and schizoaffective disorders. *AnnGenPsychiatry* 2015;**14**:6.
- 38 . Grof P, Duffy A, Cavazzoni P, *et al.* Is response to prophylactic lithium a familial trait? *J Clin Psychiatry* 2002;**63**:942–7.
- 39 . Cawthon RM. Telomere measurement by quantitative PCR. *Nucleic Acids Res* 2002;**30**:47e – 47.
- 40 . Cantara S, Pisu M, Frau DV, *et al.* Telomere abnormalities and chromosome fragility in patients affected by familial papillary thyroid cancer. *J Clin Endocrinol Metab* 2012;**97**:E1327-31.
- 41 . Klindworth A, Pruesse E, Schweer T, *et al.* Evaluation of general 16S ribosomal RNA gene PCR primers for classical and next-generation sequencing-based diversity studies. *Nucleic Acids Res* 2013;**41**:e1.
- 42 . R Core Team. R: A language and environment for statistical computing. R Foundation for Statistical Computing, Vienna, Austria. 2019.

- 1  
2  
3 43 . Nguyen TT, Eyer LT, Jeste D V. Systemic biomarkers of accelerated aging in schizophrenia: a  
4 critical review and future directions. *Schizophr Bull* 2017;**44**:398–408.  
5  
6 44 . Squassina A, Pisanu C, Corbett N, *et al*. Telomere length in bipolar disorder and lithium response.  
7 *Eur Neuropsychopharmacol* 2017;**27**:560–7.  
8  
9 45 . Squassina A, Pisanu C, Vanni R. Mood Disorders, Accelerated Aging, and Inflammation: Is the Link  
10 Hidden in Telomeres? *Cells* 2019;**8**:52.  
11  
12 46 . Russo P, Prinzi G, Proietti S, *et al*. Shorter telomere length in schizophrenia: Evidence from a real-  
13 world population and meta-analysis of most recent literature. *Schizophr Res* 2018;**202**:37–45.  
14  
15 47 . Huang Y-C, Wang L-J, Tseng P-T, *et al*. Leukocyte telomere length in patients with bipolar disorder:  
16 An updated meta-analysis and subgroup analysis by mood status. *Psychiatry Res* 2018;**270**:41–9.  
17  
18 48 . Munkholm K, Vinberg M, Kessing LV. Cytokines in bipolar disorder: a systematic review and meta-  
19 analysis. *J Affect Disord* 2013;**144**:16–27.  
20  
21 49 . Peng W, Yi P, Yang J, *et al*. Association of gut microbiota composition and function with a  
22 senescence-accelerated mouse model of Alzheimer’s Disease using 16S rRNA gene and  
23 metagenomic sequencing analysis. *Aging (Albany NY)* 2018;**10**:4054.  
24  
25  
26  
27  
28  
29  
30  
31  
32  
33  
34  
35  
36  
37  
38  
39  
40  
41  
42  
43  
44  
45  
46  
47  
48  
49  
50  
51  
52  
53  
54  
55  
56  
57  
58  
59  
60

1  
2  
3  
4  
5  
6  
7  
8  
9  
10  
11  
12  
13  
14  
15  
16  
17  
18  
19  
20  
21  
22  
23  
24  
25  
26  
27  
28  
29  
30  
31  
32  
33  
34  
35  
36  
37  
38  
39  
40  
41  
42  
43  
44  
45  
46  
47  
48  
49  
50  
51  
52  
53  
54  
55  
56  
57  
58  
59  
60

### **Author statement**

MM contributed to the design of the study protocol and wrote the first draft of the manuscript. PP co-wrote the first draft of the manuscript. AS designed the study protocol and co-wrote the first draft of the manuscript. CA, AB, PC, CC, DC, EC, TD, DF, MG, EM, AM, MAM, Amur, MN, BN, FP, CP, RR, GS, VS, critically revised the manuscript and contributed to the discussion. CChill, BC, MDZ, GLF, RV, contributed to the design of the study protocol and critically revised the manuscript.

### **Acknowledgment**

We wish to thank all the patients who are participating to this study. We also thank the nurses Ms. Flavia Orrù (Unit of Clinical Pharmacology, University Hospital Agency of Cagliari), and Ms. Anna Greca Floris, Mr. Gianluca Carta, Mr. Sergio Deiana, Ms. Gioia Gabriela Delogu, Mr. Giovanni Dessanai, Ms. Maria Elisabetta Loche, Mr. Giampiero Neri, Ms. Maria Cristina Olmi, Ms. Enrica Pintus, Ms. Loredana Satta (Unit of Clinical Psychiatry of the University Hospital Agency of Cagliari) for helping with the recruitment procedures.

### **Funding**

This work was supported by Fondazione di Sardegna (“Convenzione triennale 2015–2017”) and by the Autonomous Region of Sardinia (“Legge Regionale 7 agosto 2007, n. 7 – call 2016”), grant number F72F16003090002.

### **Conflict of interest**

The authors of this paper do not have any competing interest in relation with the content of the present study.

1  
2  
3  
4  
5  
6  
7  
8  
9  
10  
11  
12  
13  
14  
15  
16  
17  
18  
19  
20  
21  
22  
23  
24  
25  
26  
27  
28  
29  
30  
31  
32  
33  
34  
35  
36  
37  
38  
39  
40  
41  
42  
43  
44  
45  
46  
47  
48  
49  
50  
51  
52  
53  
54  
55  
56  
57  
58  
59  
60

For peer review only

**Supplementary Table 1.** Main socio-demographic and clinical characteristics of the sample

| <b>Variable</b>                            | <b>Bipolar disorder<br/>(N=40)</b> | <b>Schizophrenia<br/>(N =36)</b> | <b>Major depressive<br/>disorder (N = 19)</b> | <b>Healthy controls<br/>(N = 28)</b> | <b>Total (N =<br/>123)</b> |
|--------------------------------------------|------------------------------------|----------------------------------|-----------------------------------------------|--------------------------------------|----------------------------|
| Women, N (%)                               | 23 (57.5)                          | 23 (57.5)                        | 12 (63.2)                                     | 11 (39.3)                            | 50 (40.7)                  |
| Men, N (%)                                 | 17 (42.5)                          | 32 (88.9)                        | 6 (31.6)                                      | 17 (60.7)                            | 72 (58.5)                  |
| Age (mean $\pm$ SD)                        | 51.5 $\pm$ 10.7                    | 46.7 $\pm$ 12.4                  | 56.1 $\pm$ 7.9                                | 42.5 $\pm$ 11.6                      | 48.7 $\pm$ 11.9            |
| Age of onset (mean $\pm$ SD)               | 25.3 $\pm$ 9.4                     | 25.6 $\pm$ 7.4                   | 33.8 $\pm$ 12.0                               |                                      | 27.1 $\pm$ 9.7             |
| Paternal age at conception (mean $\pm$ SD) | 33.8 $\pm$ 5.9                     | 33.2 $\pm$ 6.5                   | 33.8 $\pm$ 4.7                                | 33.4 $\pm$ 5.7                       | 33.5 $\pm$ 5.8             |
| History of suicide attempt, N (%)          | 11(27.5)                           | 8 (22.5)                         | 2 (16.7)                                      |                                      | 22                         |
| History of violent attempt, N (%)          | 4 (10.0)                           | 1 (2.8)                          | 2 (11.1)                                      |                                      | 7                          |
| Vegan diet, N (%)                          | 2 (5.0)                            | 1 (2.9)                          | 0 (0.0)                                       | 0 (0.0)                              | 3 (2.5)                    |
| Physical activity, N (%)                   | 18 (45.0)                          | 15 (41.7)                        | 5 (27.8)                                      | 20 (71.4)                            | 58 (47.5)                  |
| Metabolic co-morbidity, N (%)              | 13 (32.5)                          | 12 (38.7)                        | 5 (27.8)                                      | 1 (3.6)                              | 31 (25.4)                  |
| Cardiovascular co-morbidity, N (%)         | 6 (15.0)                           | 5 (13.9)                         | 3 (16.7)                                      | 7 (25)                               | 21(17.2)                   |
| Current treatment – lithium, N (%)         | 40 (100)                           | 1 (2.8)                          | 1 (5.6)                                       |                                      |                            |
| Current treatment – antipsychotics, N (%)  | 19 (47.5)                          | 36 (100)                         | 4 (22.2)                                      |                                      |                            |
| Current treatment – general, N (%)         | 40 (100)                           | 36 (100)                         | 17 (94.4)                                     |                                      |                            |

SD: standard deviation
