# Supplementary material for: A multidisciplinary approach to mental illness: do inflammation, telomere length and microbiota form a loop? A protocol for a cross-sectional study on the complex relationship between inflammation, telomere length, gut microbiota and psychiatric disorders
Source: PubMed Central journal article supplement — BMJ Open. 2020 Jan 26;10(1):e032513. doi: 10.1136/bmjopen-2019-032513 (PMC7045141; doi:10.1136/bmjopen-2019-032513), 2020-01-26
Supplement: bmjopen-2019-032513supp001.pdf [file bmjopen-2019-032513supp001.pdf]

**Supplementary Table 1.** Main socio-demographic and clinical characteristics of the sample

| <b>Variable</b>                           | <b>Bipolar disorder<br/>(N=40)</b> | <b>Schizophrenia<br/>(N =36)</b> | <b>Major depressive<br/>disorder (N = 19)</b> | <b>Healthy controls<br/>(N = 28)</b> | <b>Total (N =<br/>123)</b> |
|-------------------------------------------|------------------------------------|----------------------------------|-----------------------------------------------|--------------------------------------|----------------------------|
| Women, N (%)                              | 23 (57.5)                          | 23 (57.5)                        | 12 (63.2)                                     | 11 (39.3)                            | 50 (40.7)                  |
| Men, N (%)                                | 17 (42.5)                          | 32 (88.9)                        | 6 (31.6)                                      | 17 (60.7)                            | 72 (58.5)                  |
| Age (mean ± SD)                           | 51.5±10.7                          | 46.7±12.4                        | 56.1±7.9                                      | 42.5±11.6                            | 48.7±11.9                  |
| Age of onset (mean ± SD)                  | 25.3±9.4                           | 25.6±7.4                         | 33.8±12.0                                     |                                      | 27.1±9.7                   |
| Paternal age at conception (mean ± SD)    | 33.8±5.9                           | 33.2±6.5                         | 33.8±4.7                                      | 33.4±5.7                             | 33.5±5.8                   |
| History of suicide attempt, N (%)         | 11(27.5)                           | 8 (22.5)                         | 2 (16.7)                                      |                                      | 22                         |
| History of violent attempt, N (%)         | 4 (10.0)                           | 1 (2.8)                          | 2 (11.1)                                      |                                      | 7                          |
| Vegan diet, N (%)                         | 2 (5.0)                            | 1 (2.9)                          | 0 (0.0)                                       | 0 (0.0)                              | 3 (2.5)                    |
| Physical activity, N (%)                  | 18 (45.0)                          | 15 (41.7)                        | 5 (27.8)                                      | 20 (71.4)                            | 58 (47.5)                  |
| Metabolic co-morbidity, N (%)             | 13 (32.5)                          | 12 (38.7)                        | 5 (27.8)                                      | 1 (3.6)                              | 31 (25.4)                  |
| Cardiovascular co-morbidity, N (%)        | 6 (15.0)                           | 5 (13.9)                         | 3 (16.7)                                      | 7 (25)                               | 21(17.2)                   |
| Current treatment – lithium, N (%)        | 40 (100)                           | 1 (2.8)                          | 1 (5.6)                                       |                                      |                            |
| Current treatment – antipsychotics, N (%) | 19 (47.5)                          | 36 (100)                         | 4 (22.2)                                      |                                      |                            |
| Current treatment – general, N (%)        | 40 (100)                           | 36 (100)                         | 17 (94.4)                                     |                                      |                            |

SD: standard deviation
